# Supplementary material for: Prevalence and determinants of anaemia in children aged 6–59 months in Africa: a protocol for systematic review and meta-analysis
Source: PubMed Central journal article supplement — BMJ Open. 2020 Apr 16;10(4):e032042. doi: 10.1136/bmjopen-2019-032042 (PMC7199940; doi:10.1136/bmjopen-2019-032042), 2020-04-16
Supplement: bmjopen-2019-032042.draft_revisions.pdf [file bmjopen-2019-032042.draft_revisions.pdf]

# BMJ Open

BMJ Open is committed to open peer review. As part of this commitment we make the peer review history of every article we publish publicly available.

When an article is published we post the peer reviewers' comments and the authors' responses online. We also post the versions of the paper that were used during peer review. These are the versions that the peer review comments apply to.

The versions of the paper that follow are the versions that were submitted during the peer review process. They are not the versions of record or the final published versions. They should not be cited or distributed as the published version of this manuscript.

BMJ Open is an open access journal and the full, final, typeset and author-corrected version of record of the manuscript is available on our site with no access controls, subscription charges or pay-per-view fees (<http://bmjopen.bmj.com>).

If you have any questions on BMJ Open's open peer review process please email [info.bmjopen@bmj.com](mailto:info.bmjopen@bmj.com)

# BMJ Open

## Prevalence of anaemia in children under five in Africa: a protocol for systematic review and meta-analysis

|                               |                                                                                                                                                                                                                                                                                                                                                                                                                                                                                                                                                                                                                                                                                                                                                                                                                                                                                         |
|-------------------------------|-----------------------------------------------------------------------------------------------------------------------------------------------------------------------------------------------------------------------------------------------------------------------------------------------------------------------------------------------------------------------------------------------------------------------------------------------------------------------------------------------------------------------------------------------------------------------------------------------------------------------------------------------------------------------------------------------------------------------------------------------------------------------------------------------------------------------------------------------------------------------------------------|
| Journal:                      | <i>BMJ Open</i>                                                                                                                                                                                                                                                                                                                                                                                                                                                                                                                                                                                                                                                                                                                                                                                                                                                                         |
| Manuscript ID                 | bmjopen-2019-032042                                                                                                                                                                                                                                                                                                                                                                                                                                                                                                                                                                                                                                                                                                                                                                                                                                                                     |
| Article Type:                 | Protocol                                                                                                                                                                                                                                                                                                                                                                                                                                                                                                                                                                                                                                                                                                                                                                                                                                                                                |
| Date Submitted by the Author: | 13-Jun-2019                                                                                                                                                                                                                                                                                                                                                                                                                                                                                                                                                                                                                                                                                                                                                                                                                                                                             |
| Complete List of Authors:     | Simo, Larissa Pone ; Faculty of Health Sciences, University of Bamenda, Bamenda, Cameroon<br>Agbor, Ndip; Ibal sub-Divisional Hospital, General practice<br>AgborNdip, Ettamba; Health Education and Research Organization (HERO), Department of Clinical Research<br>Ekaney, Domin Sone ; Health Education and Research Organization (HERO), Department of Clinical Research<br>Mbeng , Emmanuel ; Health Education and Research Organization (HERO), Department of Clinical Research<br>Linonge, Christie ; Health Education and Research Organization (HERO), Department of Clinical Research<br>Neba , Kilton ; Health Education and Research Organization (HERO), Department of Clinical Research<br>Kemah, Ben-Lawrence ; Health Education and Research Organization (HERO), Department of Clinical Research<br>Mbanya , Dora ; University of Bamenda, Faculty of Health Sciences |
| Keywords:                     | Anaemia < HAEMATOLOGY, Child, Infant, Africa                                                                                                                                                                                                                                                                                                                                                                                                                                                                                                                                                                                                                                                                                                                                                                                                                                            |
|                               |                                                                                                                                                                                                                                                                                                                                                                                                                                                                                                                                                                                                                                                                                                                                                                                                                                                                                         |

SCHOLARONE™  
Manuscripts

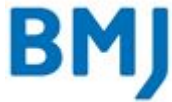

I, the Submitting Author has the right to grant and does grant on behalf of all authors of the Work (as defined in the below author licence), an exclusive licence and/or a non-exclusive licence for contributions from authors who are: i) UK Crown employees; ii) where BMJ has agreed a CC-BY licence shall apply, and/or iii) in accordance with the terms applicable for US Federal Government officers or employees acting as part of their official duties; on a worldwide, perpetual, irrevocable, royalty-free basis to BMJ Publishing Group Ltd ("BMJ") its licensees and where the relevant Journal is co-owned by BMJ to the co-owners of the Journal, to publish the Work in this journal and any other BMJ products and to exploit all rights, as set out in our [licence](#).

The Submitting Author accepts and understands that any supply made under these terms is made by BMJ to the Submitting Author unless you are acting as an employee on behalf of your employer or a postgraduate student of an affiliated institution which is paying any applicable article publishing charge ("APC") for Open Access articles. Where the Submitting Author wishes to make the Work available on an Open Access basis (and intends to pay the relevant APC), the terms of reuse of such Open Access shall be governed by a Creative Commons licence – details of these licences and which [Creative Commons](#) licence will apply to this Work are set out in our licence referred to above.

Other than as permitted in any relevant BMJ Author's Self Archiving Policies, I confirm this Work has not been accepted for publication elsewhere, is not being considered for publication elsewhere and does not duplicate material already published. I confirm all authors consent to publication of this Work and authorise the granting of this licence.

# Prevalence of anaemia in children under five in Africa: a protocol for systematic review and meta-analysis

**Authors:** Larissa Simo Pone <sup>1,2</sup>; Valirie Ndip Agbor <sup>3,4</sup>; Ettamba AgborNdip <sup>4,5</sup>; Domin Sone M. Ekaney <sup>2,4,6</sup>; Emmanuel Njang Mbeng <sup>4</sup>; Christie Etom Linonge <sup>2,4</sup>; Kilton Nforchu Neba <sup>4,6</sup>; Ben-Lawrence Ayong Kemah <sup>4</sup>; Dora Mbanya <sup>1,7</sup>

## Affiliations:

- 1: Faculty of Health Sciences, the University of Bamenda, Cameroon
- 2: Clinical Research Education, Networking & Consultancy (CRENC), Douala, Cameroon
- 3: Ibal Sub-divisional Hospital, Oku, North West Region, Cameroon
- 4: Department of Clinical Research, Health Education and Research Organization (HERO), Cameroon
- 5: Institute of Child Health, University College London, London, United Kingdom.
- 6: Ecole de Santé Publique, Université Libre de Bruxelles, Bruxelles, Belgium
- 7: Yaoundé University Teaching Hospital (YUTH), Yaoundé, Cameroon.

**Email addresses:** LPS: [ponelarissa@gmail.com](mailto:ponelarissa@gmail.com); VNA: [nvagbor@gmail.com](mailto:nvagbor@gmail.com); EA: [ettamba.agborndip@herocameroon.org](mailto:ettamba.agborndip@herocameroon.org); DSME: [domin.ekaney@herocameroon.org](mailto:domin.ekaney@herocameroon.org); ENM: [njangjr@gmail.com](mailto:njangjr@gmail.com); CEL: [christie.linonge@herocameroon.org](mailto:christie.linonge@herocameroon.org); KNN: [nforchuneba@yahoo.com](mailto:nforchuneba@yahoo.com); BAK: [kbenlawrence@gmail.com](mailto:kbenlawrence@gmail.com); DM: [dmbanya1@yahoo.co.uk](mailto:dmbanya1@yahoo.co.uk)

**Corresponding author:** Valirie Ndip Agbor, MD, Email: [nvagbor@gmail.com](mailto:nvagbor@gmail.com). Tel. 00 237 676546548

## Abstract

**Introduction:** Anaemia, especially in children less than five years old, is a global health problem disproportionately affecting populations in low- and middle-income countries. It is associated with high disability and death rates and has a negative effect on development. This study seeks to evaluate the prevalence of anaemia in children less than five years residing in Africa.

**Methods and analysis:** This protocol was prepared using the 2015 Preferred Reporting Items for Systematic Reviews and Meta-analyses for Protocols (PRISMA-P) guidelines. Relevant citations will be identified by searching EMBASE, Web of Science, PubMed, Global Medicus Index, and African Journals Online from inception to 30 April 2019 with no language restrictions. Two authors will independently screen and select eligible studies for the review. Random effect meta-analytic methods will be used to pool study-specific estimates and heterogeneity will be assessed and quantified using the  $\chi^2$  test on Cochrane's Q and  $I^2$  statistics, respectively. Publication bias will be evaluated using funnel plots and Egger's test. Subgroup analysis and multiple meta-regression using backward elimination will be performed to account for substantial heterogeneity.

**Ethics and dissemination:** No ethical approval is required for this study as it is based on already published data. The findings of the review will be published in a peer-reviewed journal and presented at conferences.

**Keywords:** Anaemia, child, infant, Africa.

**Word count:** Abstract = 234; main text = 1460

Number of tables =1; Number of figures =0; supplementary files =2

### Strengths and limitations of the study

1. This will be the first systematic review and meta-analysis on a serious developmental problem on the African continent.
2. We anticipate substantial heterogeneity in the prevalence of anaemia among published studies in Africa.
3. Nevertheless, appropriate systematic review and robust meta-analytic methods will be used to conduct the review and account for heterogeneity across studies, if any.

## Introduction

Anaemia is a global public health problem associated with higher morbidity and mortality rates, increase hospitalisation and a reverse effect on socioeconomic development [1–3]. Anaemia in infancy is associated with long-lasting effects on the brain and behaviour leading to poorer motor, cognitive and social-emotional functions [4, 5]. The World Health Organisation (WHO) currently defines anaemia in children aged 6-59 months as a haemoglobin concentration less than 110g/l [6]. The aetiologies of anaemia could be multifactorial and vary globally depending on geography, age and gender [7]. Nonetheless, Iron deficiency anaemia (IDA) is known to be the most important contributing factor to the global burden of the disease [6]. Other aetiologies of anaemia include other nutritional deficiencies (folate, B6, B12), haemoglobinopathies, parasitic infections, as well as acute and chronic inflammation [1, 6]. In a systematic analysis from 1990 to 2010, Kassebaum *et al* reported malaria, schistosomiasis and chronic kidney disease-related anaemia as the only conditions whose prevalence were found to be on the rise [7].

In 2010, the global prevalence of anaemia was estimated at 32.9% with the regions of South East Asia, Central, West and East sub-Saharan Africa bearing the greatest burden [7]. Though occurring at different stages in the life cycle, pregnant women and preschool age children have been found to be at greatest risk of having the disease [1], with children aged less than five years found to be the only age group with a negative trend from 1990 to 2010 [7]. The WHO estimates of 2011 suggest that about 273 million children and 42 million pregnant women have anaemia worldwide [6].

The prevalence of anaemia in children under five years in Africa varies from 9.7% in South eastern Nigeria to 78.4% in Ghana [8, 9]. Existing evidence suggests that severe anaemia, accounting for most anaemia-related deaths, mostly occurs among the under-five years age group, and generally in the rainy season (in the tropics) when the incidence of malaria is at its peak [8]. Furthermore, Brabin *et al* report that mortality due to severe anaemia from malaria is greater than that from iron deficiency anaemia in sub-Saharan Africa [10]. Besides malaria endemicity, poor nutrition, sickle cell disease, late arrival at health facilities, ignorance and poverty also account for high prevalence rates anaemia in this region [8, 11].

The prevalence of anaemia being an important health indicator coupled with the dearth of literature on the prevalence of anaemia in children under five residing in Africa prompted the need for this study to assess the burden of anaemia among this age group and inform policies aimed at achieving the sustainable development goal 3.2 [12].

## Objective

The aim of this systematic review is to determine the prevalence of anaemia in children under five years in Africa.

## Review question

What is the prevalence of anaemia in children under five years in Africa?

## Methods

### Criteria for selection of studies for the review

#### Inclusion criteria

1. Cross-sectional and cohort studies published up to 30 April 2019 with available data to compute the prevalence of anaemia in children below five years
2. Studies which diagnosed anaemia using haemoglobin measurements
3. Studies which defined anaemia as haemoglobin levels below 110 g/l according to WHO and the United Nations Children Funds [13]
4. Age limit: children from 6 to 59 months of age

#### Exclusion criteria

1. Reviews, case reports and case series with less than 30 participants
2. Studies conducted in a population with haemoglobinopathies like as sickle cell anaemia.
3. Studies with no information on the tool used to diagnose anaemia.

### Information sources

#### Search strategy

We will search for relevant titles and abstracts on anaemia in children under five published in EMBASE, Web of Science, PubMed, Global Medicus Index, and African Journals Online from inception to 30 April 2019. Medical subject headings and key text words like 'anaemia' OR 'anemia' OR 'haemoglobin' will be combined to a list of the 54 African nations to optimise the sensitivity of our search, Table 1. The references of eligible full text will also be screened for potential articles which we missed during our search.

#### Study records

#### Data management and study screening

1  
2  
3 The titles and abstracts of from database searches will be exported to EndNote X9 for removal of  
4 duplicates. The remaining titles and abstracts will then be exported to the application Rayyan QCRI  
5 [14] for screening of titles and abstracts. The full text of selected abstracts will be downloaded and  
6 assessed using the eligibility criteria for final inclusion. The full texts of citations identified through  
7 bibliographic screening will also be assessed for eligibility before final inclusion. The screening  
8 process will be independently conducted by two authors and any discrepancies will be resolved  
9 through discussion until a consensus is reached, otherwise a third author will be called upon for  
10 arbitration.  
11  
12  
13  
14  
15  
16

### 17 **Data items and extraction**

18  
19  
20 A pre-structured Google Form will be used for data abstraction by two authors after which the authors  
21 will then crosscheck each other's database for completeness and correctness. Data will be extracted on  
22 the surname of the first author and the year of publication, the country of study, the region of Africa  
23 (northern, southern, eastern, western and central), the study area (urban, rural and suburbs), study  
24 design (cross sectional, cohort), study setting (hospital, school and community-based), sampling  
25 method (random sampling, consecutive, convenient), timing of data collection (prospective vs  
26 retrospective), male proportion, mean or median age in months, sample size, number of participants  
27 with anaemia, number of male participants, number of males with anaemia, number of female  
28 participants, number of females with anaemia, number of participants with mild anaemia, number of  
29 male participants with mild anaemia, number of female participants with mild anaemia, number of  
30 participants with moderate, number of male participants with moderate anaemia, number of female  
31 participants with moderate anaemia, number of participants with severe anaemia, number of male  
32 participants with severe anaemia, number of female participants with severe anaemia.  
33  
34  
35  
36  
37  
38  
39  
40  
41  
42

43 Where possible, data for multinational studies will be separated reported according to the country  
44 where the study was conducted. Else, they will be reported as a single study, and the countries where  
45 the study was conducted will be highlighted.  
46  
47  
48

### 49 **Assessment of methodological quality and risk of bias**

50  
51 Quality assessment of the included studies will be conducted simultaneously with the process of data  
52 abstraction. An adapted version of the Hoy *et al* [15] tool, to assess the risk of bias for prevalence  
53 studies, will be used to assess the study quality which will be scored on 10, **Supplementary Table 1**.  
54 Scores of 0 – 4, 5 – 7 and 8 – 10 will represent low moderate and high risk of bias, respectively  
55  
56  
57  
58

### 59 **Data synthesis and analysis**



1  
2  
3 The 'meta' package of the statistical software R (version 3.5.3, The R Foundation for statistical  
4 computing, Vienna, Austria) will be used for data analysis. The Cohen  $k$  statistics will be used to  
5 evaluate inter-rater agreement between authors for study inclusion [16]. The numerators and  
6 denominators of interest from each individual study will be used to calculate the study specific  
7 prevalence estimates before pooling using random effect models. Before pooling, the Freeman-Tukey  
8 double arcsine transformation will be used to stabilise the variance of each study-specific estimate  
9 [17]. The  $\chi^2$  test on Cochran's  $Q$  statistics, and  $I^2$  will be used to assess and quantify heterogeneity  
10 across studies, respectively [18].  $I^2$  values of 70% or over will be considered to be evidence of substantial  
11 heterogeneity [19]. Prevalence estimates will be pooled according to the different Africa regions, the  
12 Q-test of analysis of variance will be used to compare the pooled estimates. Publication bias will be  
13 assessed visually funnel plots for asymmetry and confirmed statistically using the Egger's test [19]. P  
14 values below 10% on Egger's test will be considered statistically significant for publication bias.

15  
16  
17 In case of substantial heterogeneity across studies, a subgroup analysis will be conducted with the  
18 following variables: study region (North Africa [northern] vs sub-Saharan Africa [southern, western,  
19 central and eastern]), study setting (hospital-based, school-based and community-based), gender (Male  
20 vs Female) study area (rural, urban, suburb), random sampling (Yes/No) and age groups.

21  
22  
23 A multiple meta-regression analysis using backward elimination will be used to assess the impact of  
24 age, gender, publication year, study region (North Africa [northern] vs sub-Saharan Africa [southern,  
25 western, central and eastern]), study area (rural, urban, suburb), study sampling (random vs non-  
26 random) and year of publication on the overall summary proportion. Only variables with p values <0.1  
27 on bivariate analysis will be included in the multiple regression model. Two-sided p-values less than  
28 5% will be considered statistically significant.

### 29 30 31 **Patient and public involvement**

32  
33  
34 Patients and/or the public were not directly involved in this study.

### 35 36 37 **Presentation and reporting of results**

38  
39  
40 The Preferred Reporting Items for Systematic Reviews and Meta-Analyses 2009 statement [20] will  
41 be used to publish this review. The process of study screening and selection will be reported with the  
42 aid of a flow diagram depicting the reason(s) of study exclusion. Prevalence measures will be displayed  
43 using forest plots and tables. The risk of bias assessment will be presented as narrative summaries and  
44 using tables.

### Protocol amendments

The authors do not plan to modify this protocol. Nevertheless, subsequent revisions in the study review will be carefully reported.

**Contributors:** Study conception: VNA; Designed the protocol: LPS , VNA; Drafted the protocol: LPS, VNA; Protocol revision: EA, DSME, ENM, CEL, KNN, BAK Critical revision: DM. VNA is the guarantor of this review.

**Competing interest:** None.

**Funding:** This research received no specific grant from any funding agency in the public, commercial or not-for-profit sectors.

### Data sharing statement

No additional data are available

## References

1. Welcome to CDC stacks | Worldwide prevalence of anaemia 1993-2005; WHO Global Database of anaemia - 5351 | Stephen B. Thacker CDC Library collection. <https://stacks.cdc.gov/view/cdc/5351>. Accessed 17 Apr 2019.
2. Mbanya D, Tayou Tagny C, Mboka C, Tetanye E. Clinical indices of severe anaemia requiring transfusion in young children aged 0 – 5 years: Guidelines for resource-limited settings. *Afr Sang*. 2008;2:1–4.
3. Scott SP, Chen-Edinboro LP, Caulfield LE, Murray-Kolb LE. The Impact of Anemia on Child Mortality: An Updated Review. *Nutrients*. 2014;6:5915–32.
4. Lozoff B, Beard J, Connor J, Felt B, Georgieff M, Schallert T. Long-Lasting Neural and Behavioral Effects of Iron Deficiency in Infancy. *Nutr Rev*. 2006;64 5 Pt 2:S34–91.
5. Santos JN, Rates SPM, Lemos SMA, Lamounier JA. Consequences of anemia on language development of children from a public day care center. *Rev Paul Pediatr*. 2009;27:67–73.
6. World Health Organization. Haemoglobin concentrations for the diagnosis of anaemia and assessment of severity. <https://apps.who.int/iris/handle/10665/85839>.
7. Kassebaum NJ, Jasrasaria R, Naghavi M, Wulf SK, Johns N, Lozano R, et al. A systematic analysis of global anemia burden from 1990 to 2010. *Blood*. 2014;123:615–24.
8. Muoneke VU, Chidilbekwe R. Prevalence and Aetiology of Severe Anaemia in Under-5 Children in Abakaliki South Eastern Nigeria. 2011.
9. Ewusie JE, Ahiadeke C, Beyene J, Hamid JS. Prevalence of anemia among under-5 children in the Ghanaian population: estimates from the Ghana demographic and health survey. *BMC Public Health*. 2014;14:626.
10. Brabin BJ, Premji Z, Verhoeff F. An Analysis of Anemia and Child Mortality. *J Nutr*. 2001;131:636S-648S.
11. Mbanya D, Tagny CT, Akamba A, Mekongo MO, Tetanye E. [Causes of anaemia in African children aged 5 to 10 years]. *Sante Montrouge Fr*. 2008;18:227–30.
12. WHO | Sustainable Development Goal 3: Health. WHO. <http://www.who.int/topics/sustainable-development-goals/targets/en/>. Accessed 3 May 2019.
13. WHO. Iron deficiency anemia. Assessment, prevention, and control. *Guide Programme Manag*. 2001;:47–62.
14. Ouzzani M, Hammady H, Fedorowicz Z, Elmagarmid A. Rayyan—a web and mobile app for systematic reviews. *Syst Rev*. 2016;5:210.
15. Hoy D, Brooks P, Woolf A, Blyth F, March L, Bain C, et al. Assessing risk of bias in prevalence studies: modification of an existing tool and evidence of interrater agreement. *J Clin Epidemiol*. 2012;65:934–9.

16. McHugh ML. Interrater reliability: the kappa statistic. *Biochem Medica Biochem Medica*. 2012;22:276–82.

| SN | Search Items | Hits |
|----|--------------|------|
|----|--------------|------|

17. Miller JJ. The Inverse of the Freeman – Tukey Double Arcsine Transformation. *Am Stat*. 1978;32:138–138.

18. Cochran WG. The Combination of Estimates from Different Experiments. *Biometrics*. 1954;10:101–29.

19. Egger M, Smith GD, Schneider M, Minder C. Bias in meta-analysis detected by a simple, graphical test. *BMJ*. 1997;315:629–34.

20. Liberati A, Altman DG, Tetzlaff J, Mulrow C, Gøtzsche PC, Ioannidis JPA, et al. The PRISMA Statement for Reporting Systematic Reviews and Meta-Analyses of Studies That Evaluate Health Care Interventions: Explanation and Elaboration. *PLOS Med*. 2009;6:e1000100.

## List of tables

Table 1: Search Strategy for PubMed

Supplementary Table 1: Risk of bias assessment checklist for prevalence studies (adapted from Hoy et al)

|    |                                                                                                                                                                                                                                                                                                                                                                                                                                                                                                                                                                                                                                                                                                                                                                                                                                                                                                                                                                                                                                                                                                                                                                                                                                                                                                                                                                                                                                                                                                                                                                                                                                                                                                                                                                                                                                                                                                                                                                                                                  |  |
|----|------------------------------------------------------------------------------------------------------------------------------------------------------------------------------------------------------------------------------------------------------------------------------------------------------------------------------------------------------------------------------------------------------------------------------------------------------------------------------------------------------------------------------------------------------------------------------------------------------------------------------------------------------------------------------------------------------------------------------------------------------------------------------------------------------------------------------------------------------------------------------------------------------------------------------------------------------------------------------------------------------------------------------------------------------------------------------------------------------------------------------------------------------------------------------------------------------------------------------------------------------------------------------------------------------------------------------------------------------------------------------------------------------------------------------------------------------------------------------------------------------------------------------------------------------------------------------------------------------------------------------------------------------------------------------------------------------------------------------------------------------------------------------------------------------------------------------------------------------------------------------------------------------------------------------------------------------------------------------------------------------------------|--|
| 1. | (((Africa* [tiab] OR Algeria [tiab] OR Angola [tiab] OR Benin [tiab] OR Botswana [tiab] OR "Burkina Faso" [tiab] OR Burundi [tiab] OR Cameroon [tiab] OR "Canary Islands" [tiab] OR "Cape Verde" [tiab] OR "Central African Republic" [tiab] OR Chad [tiab] OR Comoros [tiab] OR Congo [tiab] OR "Democratic Republic of Congo" [tiab] OR Djibouti [tiab] OR Egypt [tiab] OR "Equatorial Guinea" [tiab] OR Eritrea [tiab] OR Ethiopia [tiab] OR Gabon [tiab] OR Gambia [tiab] OR Ghana [tiab] OR Guinea [tiab] OR "Guinea Bissau" [tiab] OR "Ivory Coast" [tiab] OR "Cote d'Ivoire" [tiab] OR Jamahiriya [tiab] OR Kenya [tiab] OR Lesotho [tiab] OR Liberia [tiab] OR Libya [tiab] OR Madagascar [tiab] OR Malawi [tiab] OR Mali [tiab] OR Mauritania [tiab] OR Mauritius [tiab] OR Mayotte [tiab] OR Morocco [tiab] OR Mozambique [tiab] OR Namibia [tiab] OR Niger [tiab] OR Nigeria [tiab] OR Principe [tiab] OR Reunion [tiab] OR Rwanda [tiab] OR "Sao Tome" [tiab] OR Senegal [tiab] OR Seychelles [tiab] OR "Sierra Leone" [tiab] OR Somalia [tiab] OR "South Africa" [tiab] OR "South Sudan" [tiab] OR "St Helena" [tiab] OR Sudan [tiab] OR Swaziland [tiab] OR Tanzania [tiab] OR Togo [tiab] OR Tunisia [tiab] OR Uganda [tiab] OR "Western Sahara" [tiab] OR Zaire [tiab] OR Zambia [tiab] OR Zimbabwe [tiab] OR "Central Africa" [tiab] OR "Central African" [tiab] OR "West Africa" [tiab] OR "West African" [tiab] OR "Western Africa" [tiab] OR "Western African" [tiab] OR "East Africa" [tiab] OR "East African" [tiab] OR "Eastern Africa" [tiab] OR "Eastern African" [tiab] OR "North Africa" [tiab] OR "North African" [tiab] OR "Northern Africa" [tiab] OR "Northern African" [tiab] OR "South African" [tiab] OR "Southern Africa" [tiab] OR "Southern African" [tiab] OR "sub Saharan Africa" [tiab] OR "sub Saharan African" [tiab] OR "subSaharan Africa" [tiab] OR "subSaharan African" [tiab]) NOT ("guinea pig" [tiab] OR "guinea pigs" [tiab] OR "aspergillus niger [tiab]")))) |  |
| 2. | ('anemia' OR 'anaemia' OR 'anemias' OR 'anaemias' OR 'hemoglobin' OR 'haemoglobin')                                                                                                                                                                                                                                                                                                                                                                                                                                                                                                                                                                                                                                                                                                                                                                                                                                                                                                                                                                                                                                                                                                                                                                                                                                                                                                                                                                                                                                                                                                                                                                                                                                                                                                                                                                                                                                                                                                                              |  |
| 3. | #1 AND #2                                                                                                                                                                                                                                                                                                                                                                                                                                                                                                                                                                                                                                                                                                                                                                                                                                                                                                                                                                                                                                                                                                                                                                                                                                                                                                                                                                                                                                                                                                                                                                                                                                                                                                                                                                                                                                                                                                                                                                                                        |  |
| 4. | ((("Child, Preschool"[Mesh]) AND "Infant"[Mesh]))                                                                                                                                                                                                                                                                                                                                                                                                                                                                                                                                                                                                                                                                                                                                                                                                                                                                                                                                                                                                                                                                                                                                                                                                                                                                                                                                                                                                                                                                                                                                                                                                                                                                                                                                                                                                                                                                                                                                                                |  |
| 5. | #3 AND #4                                                                                                                                                                                                                                                                                                                                                                                                                                                                                                                                                                                                                                                                                                                                                                                                                                                                                                                                                                                                                                                                                                                                                                                                                                                                                                                                                                                                                                                                                                                                                                                                                                                                                                                                                                                                                                                                                                                                                                                                        |  |

Table 1: Search Strategy for PubMed

## Supplementary Table 1: Risk of bias assessment checklist for prevalence studies (adapted from Hoy et al)

| Name of author(s):                                                                                                                                            |                                                                                                                                                                                                                                                |               |
|---------------------------------------------------------------------------------------------------------------------------------------------------------------|------------------------------------------------------------------------------------------------------------------------------------------------------------------------------------------------------------------------------------------------|---------------|
| Year of publication:                                                                                                                                          |                                                                                                                                                                                                                                                |               |
| Study title:                                                                                                                                                  |                                                                                                                                                                                                                                                |               |
| Risk of bias items                                                                                                                                            | Risk of bias levels                                                                                                                                                                                                                            | Points scored |
| 1. Was the study's target population a close representation of the national population in relation to relevant variables, e.g. age, sex, occupation?          | <b>Yes (LOW RISK):</b> The study's target population was a close representation of the national population.                                                                                                                                    | 0             |
|                                                                                                                                                               | <b>No (HIGH RISK):</b> The study's target population was clearly NOT representative of the national population.                                                                                                                                | 1             |
| 2. Was the sampling frame a true or close representation of the target population?                                                                            | <b>Yes (LOW RISK):</b> The sampling frame was a true or close representation of the target population.                                                                                                                                         | 0             |
|                                                                                                                                                               | <b>No (HIGH RISK):</b> The sampling frame was NOT a true or close representation of the target population.                                                                                                                                     | 1             |
| 3. Was some form of random selection used to select the sample, OR, was a census undertaken?                                                                  | <b>Yes (LOW RISK):</b> A census was undertaken, OR, some form of random selection was used to select the sample (e.g. simple random sampling, stratified random sampling, cluster sampling, systematic sampling).                              | 0             |
|                                                                                                                                                               | <b>No (HIGH RISK):</b> A census was NOT undertaken, AND some form of random selection was NOT used to select the sample.                                                                                                                       | 1             |
| 4. Was the likelihood of non-response bias minimal?                                                                                                           | <b>Yes (LOW RISK):</b> The response rate for the study was $\geq 75\%$ , OR, an analysis was performed that showed no significant difference in relevant demographic characteristics between responders and non-responders                     | 0             |
|                                                                                                                                                               | <b>No (HIGH RISK):</b> The response rate was $< 75\%$ , and if any analysis comparing responders and non-responders was done, it showed a significant difference in relevant demographic characteristics between responders and non-responders | 1             |
| 5. Were data collected directly from the subjects (as opposed to a proxy)?                                                                                    | <b>Yes (LOW RISK):</b> All data were collected directly from the subjects.                                                                                                                                                                     | 0             |
|                                                                                                                                                               | <b>No (HIGH RISK):</b> In some instances, data were collected from a proxy.                                                                                                                                                                    | 1             |
| 6. Was an acceptable case definition used in the study?                                                                                                       | <b>Yes (LOW RISK):</b> An acceptable case definition was used.                                                                                                                                                                                 | 0             |
|                                                                                                                                                               | <b>No (HIGH RISK):</b> An acceptable case definition was NOT used                                                                                                                                                                              | 1             |
| 7. Was the study instrument that measured the parameter of interest (e.g. prevalence of low back pain) shown to have reliability and validity (if necessary)? | <b>Yes (LOW RISK):</b> The study instrument had been shown to have reliability and validity (if this was necessary), e.g. test-re-test, piloting, validation in a previous study, etc.                                                         | 0             |
|                                                                                                                                                               | <b>No (HIGH RISK):</b> The study instrument had NOT been shown to have reliability or validity (if this was necessary).                                                                                                                        | 1             |
| 8. Was the same mode of data collection used for all subjects?                                                                                                | <b>Yes (LOW RISK):</b> The same mode of data collection was used for all subjects.                                                                                                                                                             | 0             |
|                                                                                                                                                               | <b>No (HIGH RISK):</b> The same mode of data collection was NOT used for all subjects.                                                                                                                                                         | 1             |
| 9. Were the numerator(s) and denominator(s) for the parameter of interest appropriate                                                                         | <b>Yes (LOW RISK):</b> The paper presented appropriate numerator(s) AND denominator(s) for the parameter of interest (e.g. the prevalence of low back pain).                                                                                   | 0             |
|                                                                                                                                                               | <b>No (HIGH RISK):</b> The paper did present numerator(s) AND denominator(s) for the parameter of interest but one or more of these were inappropriate.                                                                                        | 1             |
| 10. Summary on the overall risk of study bias                                                                                                                 | <b>LOW RISK</b>                                                                                                                                                                                                                                | 0-4           |
|                                                                                                                                                               | <b>MODERATE RISK</b>                                                                                                                                                                                                                           | 5-7           |
|                                                                                                                                                               | <b>HIGH RISK</b>                                                                                                                                                                                                                               | 8-10          |

**PRISMA-P (Preferred Reporting Items for Systematic review and Meta-Analysis Protocols) 2015 checklist: recommended items to address in a systematic review protocol**

| Section and topic                 | Item No | Checklist item                                                                                                                                                                                                                | Page #     |
|-----------------------------------|---------|-------------------------------------------------------------------------------------------------------------------------------------------------------------------------------------------------------------------------------|------------|
| <b>ADMINISTRATIVE INFORMATION</b> |         |                                                                                                                                                                                                                               |            |
| Title:                            |         |                                                                                                                                                                                                                               |            |
| Identification                    | 1a      | Identify the report as a protocol of a systematic review                                                                                                                                                                      | 1          |
| Update                            | 1b      | If the protocol is for an update of a previous systematic review, identify as such                                                                                                                                            | NA         |
| Registration                      | 2       | If registered, provide the name of the registry (such as PROSPERO) and registration number                                                                                                                                    | 3          |
| Authors:                          |         |                                                                                                                                                                                                                               |            |
| Contact                           | 3a      | Provide name, institutional affiliation, e-mail address of all protocol authors; provide physical mailing address of corresponding author                                                                                     | 1          |
| Contributions                     | 3b      | Describe contributions of protocol authors and identify the guarantor of the review                                                                                                                                           | 13         |
| Amendments                        | 4       | If the protocol represents an amendment of a previously completed or published protocol, identify as such and list changes; otherwise, state plan for documenting important protocol amendments                               | 11         |
| Support:                          |         |                                                                                                                                                                                                                               |            |
| Sources                           | 5a      | Indicate sources of financial or other support for the review                                                                                                                                                                 | 13         |
| Sponsor                           | 5b      | Provide name for the review funder and/or sponsor                                                                                                                                                                             | NA         |
| Role of sponsor or funder         | 5c      | Describe roles of funder(s), sponsor(s), and/or institution(s), if any, in developing the protocol                                                                                                                            | NA         |
| <b>INTRODUCTION</b>               |         |                                                                                                                                                                                                                               |            |
| Rationale                         | 6       | Describe the rationale for the review in the context of what is already known                                                                                                                                                 | 4          |
| Objectives                        | 7       | Provide an explicit statement of the question(s) the review will address with reference to participants, interventions, comparators, and outcomes (PICO)                                                                      | 5          |
| <b>METHODS</b>                    |         |                                                                                                                                                                                                                               |            |
| Eligibility criteria              | 8       | Specify the study characteristics (such as PICO, study design, setting, time frame) and report characteristics (such as years considered, language, publication status) to be used as criteria for eligibility for the review | 5-6        |
| Information sources               | 9       | Describe all intended information sources (such as electronic databases, contact with study authors, trial registers or other grey literature sources) with planned dates of coverage                                         | 6-7        |
| Search strategy                   | 10      | Present draft of search strategy to be used for at least one electronic database, including planned limits, such that it could be repeated                                                                                    | 6, Table 1 |
| Study records:                    |         |                                                                                                                                                                                                                               |            |
| Data                              | 11a     | Describe the mechanism(s) that will be used to manage records and data throughout the review                                                                                                                                  | 7          |

|                                    |     |                                                                                                                                                                                                                                                  |      |
|------------------------------------|-----|--------------------------------------------------------------------------------------------------------------------------------------------------------------------------------------------------------------------------------------------------|------|
| management                         |     |                                                                                                                                                                                                                                                  |      |
| Selection process                  | 11b | State the process that will be used for selecting studies (such as two independent reviewers) through each phase of the review (that is, screening, eligibility and inclusion in meta-analysis)                                                  | 7    |
| Data collection process            | 11c | Describe planned method of extracting data from reports (such as piloting forms, done independently, in duplicate), any processes for obtaining and confirming data from investigators                                                           | 8    |
| Data items                         | 12  | List and define all variables for which data will be sought (such as PICO items, funding sources), any pre-planned data assumptions and simplifications                                                                                          | 8    |
| Outcomes and prioritization        | 13  | List and define all outcomes for which data will be sought, including prioritization of main and additional outcomes, with rationale                                                                                                             | 8    |
| Risk of bias in individual studies | 14  | Describe anticipated methods for assessing risk of bias of individual studies, including whether this will be done at the outcome or study level, or both; state how this information will be used in data synthesis                             | 9    |
| Data synthesis                     | 15a | Describe criteria under which study data will be quantitatively synthesised                                                                                                                                                                      | 9-10 |
|                                    | 15b | If data are appropriate for quantitative synthesis, describe planned summary measures, methods of handling data and methods of combining data from studies, including any planned exploration of consistency (such as $I^2$ , Kendall's $\tau$ ) | 9-10 |
|                                    | 15c | Describe any proposed additional analyses (such as sensitivity or subgroup analyses, meta-regression)                                                                                                                                            | 10   |
|                                    | 15d | If quantitative synthesis is not appropriate, describe the type of summary planned                                                                                                                                                               | 10   |
| Meta-bias(es)                      | 16  | Specify any planned assessment of meta-bias(es) (such as publication bias across studies, selective reporting within studies)                                                                                                                    | 9    |
| Confidence in cumulative evidence  | 17  | Describe how the strength of the body of evidence will be assessed (such as GRADE)                                                                                                                                                               | NA   |



# BMJ Open

## Prevalence and determinants of anaemia in children aged 6 to 59 months in Africa: a protocol for systematic review and meta-analysis

|                                 |                                                                                                                                                                                                                                                                                                                                                                                                                                                                                                                                                                                                                                                                                                                                                                                                                                                                                         |
|---------------------------------|-----------------------------------------------------------------------------------------------------------------------------------------------------------------------------------------------------------------------------------------------------------------------------------------------------------------------------------------------------------------------------------------------------------------------------------------------------------------------------------------------------------------------------------------------------------------------------------------------------------------------------------------------------------------------------------------------------------------------------------------------------------------------------------------------------------------------------------------------------------------------------------------|
| Journal:                        | <i>BMJ Open</i>                                                                                                                                                                                                                                                                                                                                                                                                                                                                                                                                                                                                                                                                                                                                                                                                                                                                         |
| Manuscript ID                   | bmjopen-2019-032042.R1                                                                                                                                                                                                                                                                                                                                                                                                                                                                                                                                                                                                                                                                                                                                                                                                                                                                  |
| Article Type:                   | Protocol                                                                                                                                                                                                                                                                                                                                                                                                                                                                                                                                                                                                                                                                                                                                                                                                                                                                                |
| Date Submitted by the Author:   | 10-Sep-2019                                                                                                                                                                                                                                                                                                                                                                                                                                                                                                                                                                                                                                                                                                                                                                                                                                                                             |
| Complete List of Authors:       | Simo, Larissa Pone ; Faculty of Health Sciences, University of Bamenda, Bamenda, Cameroon<br>Agbor, Ndip; Ibal sub-Divisional Hospital, General practice<br>AgborNdip, Ettamba; Health Education and Research Organization (HERO), Department of Clinical Research<br>Ekaney, Domin Sone ; Health Education and Research Organization (HERO), Department of Clinical Research<br>Mbeng , Emmanuel ; Health Education and Research Organization (HERO), Department of Clinical Research<br>Linonge, Christie ; Health Education and Research Organization (HERO), Department of Clinical Research<br>Neba , Kilton ; Health Education and Research Organization (HERO), Department of Clinical Research<br>Kemah, Ben-Lawrence ; Health Education and Research Organization (HERO), Department of Clinical Research<br>Mbanya , Dora ; University of Bamenda, Faculty of Health Sciences |
| <b>Primary Subject Heading</b>: | Epidemiology                                                                                                                                                                                                                                                                                                                                                                                                                                                                                                                                                                                                                                                                                                                                                                                                                                                                            |
| Secondary Subject Heading:      | Paediatrics, Global health                                                                                                                                                                                                                                                                                                                                                                                                                                                                                                                                                                                                                                                                                                                                                                                                                                                              |
| Keywords:                       | Anaemia < HAEMATOLOGY, Child, Infant, Africa                                                                                                                                                                                                                                                                                                                                                                                                                                                                                                                                                                                                                                                                                                                                                                                                                                            |
|                                 |                                                                                                                                                                                                                                                                                                                                                                                                                                                                                                                                                                                                                                                                                                                                                                                                                                                                                         |

SCHOLARONE™  
Manuscripts



I, the Submitting Author has the right to grant and does grant on behalf of all authors of the Work (as defined in the below author licence), an exclusive licence and/or a non-exclusive licence for contributions from authors who are: i) UK Crown employees; ii) where BMJ has agreed a CC-BY licence shall apply, and/or iii) in accordance with the terms applicable for US Federal Government officers or employees acting as part of their official duties; on a worldwide, perpetual, irrevocable, royalty-free basis to BMJ Publishing Group Ltd ("BMJ") its licensees and where the relevant Journal is co-owned by BMJ to the co-owners of the Journal, to publish the Work in this journal and any other BMJ products and to exploit all rights, as set out in our [licence](#).

The Submitting Author accepts and understands that any supply made under these terms is made by BMJ to the Submitting Author unless you are acting as an employee on behalf of your employer or a postgraduate student of an affiliated institution which is paying any applicable article publishing charge ("APC") for Open Access articles. Where the Submitting Author wishes to make the Work available on an Open Access basis (and intends to pay the relevant APC), the terms of reuse of such Open Access shall be governed by a Creative Commons licence – details of these licences and which [Creative Commons](#) licence will apply to this Work are set out in our licence referred to above.

Other than as permitted in any relevant BMJ Author's Self Archiving Policies, I confirm this Work has not been accepted for publication elsewhere, is not being considered for publication elsewhere and does not duplicate material already published. I confirm all authors consent to publication of this Work and authorise the granting of this licence.

## Prevalence and determinants of anaemia in children aged 6 to 59 months in Africa: a protocol for systematic review and meta-analysis

**Authors:** Larissa Simo Pone <sup>1,2</sup>; Valirie Ndip Agbor <sup>3,4</sup>; Ettamba AgborNdip <sup>4,5</sup>; Domin Sone M. Ekaney <sup>2,4,6</sup>; Emmanuel Njang Mbeng <sup>4</sup>; Christie Etom Linonge <sup>2,4</sup>; Kilton Nforchu Neba <sup>4,6</sup>; Ben-Lawrence Ayong Kemah <sup>4</sup>; Dora Mbanya <sup>1,7</sup>

### Affiliations:

- 1: Faculty of Health Sciences, the University of Bamenda, Cameroon
- 2: Clinical Research Education, Networking & Consultancy (CRENC), Douala, Cameroon
- 3: Ibal Sub-divisional Hospital, Oku, North West Region, Cameroon
- 4: Department of Clinical Research, Health Education and Research Organization (HERO), Cameroon
- 5: Institute of Child Health, University College London, London, United Kingdom.
- 6: Ecole de Santé Publique, Université Libre de Bruxelles, Bruxelles, Belgium
- 7: Yaoundé University Teaching Hospital (YUTH), Yaoundé, Cameroon.

**Email addresses:** LPS: [ponelarissa@gmail.com](mailto:ponelarissa@gmail.com); VNA: [nvagbor@gmail.com](mailto:nvagbor@gmail.com); EA: [ettamba.agborndip@herocameroon.org](mailto:ettamba.agborndip@herocameroon.org); DSME: [domin.ekaney@herocameroon.org](mailto:domin.ekaney@herocameroon.org); ENM: [njangjr@gmail.com](mailto:njangjr@gmail.com); CEL: [christie.linonge@herocameroon.org](mailto:christie.linonge@herocameroon.org); KNN: [nforchuneba@yahoo.com](mailto:nforchuneba@yahoo.com); BAK: [kbenlawrence@gmail.com](mailto:kbenlawrence@gmail.com); DM: [dmbanya1@yahoo.co.uk](mailto:dmbanya1@yahoo.co.uk)

**Corresponding author:** Valirie Ndip Agbor, MD, Email: [nvagbor@gmail.com](mailto:nvagbor@gmail.com). Tel. 00 237 676546548

## Abstract

**Introduction:** Anaemia, especially in children less than five years old, is a global health problem disproportionately affecting populations in low- and middle-income countries. It is associated with high disability and death rates and has a negative effect on development. This study seeks to evaluate the prevalence and determinants of anaemia in children aged 6-59 months residing in Africa.

**Methods and analysis:** This protocol was prepared using the 2015 Preferred Reporting Items for Systematic Reviews and Meta-analyses for Protocols (PRISMA-P) guidelines. Relevant citations will be identified by searching EMBASE, Web of Science, PubMed, Global Medicus Index, and African Journals Online from inception to 30 September 2019 with no language restrictions. Two authors will independently screen and select eligible studies for the review. Random effect meta-analytic methods will be used to pool study-specific estimates and heterogeneity will be assessed and quantified using the  $\chi^2$  test on Cochrane's Q and  $I^2$  statistics, respectively. Publication bias will be evaluated using funnel plots and Egger's test. Subgroup analysis and multiple meta-regression using backward elimination will be performed to account for substantial heterogeneity.

**Ethics and dissemination:** No ethical approval is required for this study as it is based on already published data. The findings of the review will be published in a peer-reviewed journal and presented at conferences.

**Keywords:** Anaemia, child, infant, Africa.

**Word count:** Abstract = 234; main text = 1460

Number of tables =1; Number of figures =0; supplementary files =2

### Strengths and limitations of the study

1. This will be the first systematic review and meta-analysis to estimate the burden of anaemia in children aged 6-59 months living on the African continent.
2. We anticipate substantial heterogeneity in the prevalence of anaemia among published studies in Africa.
3. Nevertheless, appropriate systematic review and robust meta-analytic methods will be used to conduct the review and account for heterogeneity across studies, if any.

## Introduction

Anaemia is a global public health problem associated with higher morbidity and mortality rates, increase hospitalisation and a reverse effect on socioeconomic development [1–3]. Anaemia in infancy is associated with long-lasting effects on the brain and behaviour leading to poorer motor, cognitive and social-emotional functions [4, 5]. The World Health Organisation (WHO) currently defines anaemia in children aged 6-59 months as a haemoglobin concentration less than 110g/l [6]. The aetiologies of anaemia could be multifactorial and vary globally depending on geography, age and gender [7]. Nonetheless, Iron deficiency anaemia (IDA) is known to be the most important contributing factor to the global burden of the disease [6]. Other aetiologies of anaemia include other nutritional deficiencies (folate, B6, B12), haemoglobinopathies, parasitic infections, as well as acute and chronic inflammation [1, 6]. In a systematic analysis from 1990 to 2010, Kassebaum *et al* reported malaria, schistosomiasis and chronic kidney disease-related anaemia as the only conditions whose prevalence was found to be on the rise [7].

In 2010, the global prevalence of anaemia was estimated at 32.9% with the regions of South East Asia, Central, West and East sub-Saharan Africa bearing the greatest burden [7]. Though occurring at different stages in the life cycle, pregnant women and preschool age children have been found to be at greatest risk of having the disease [1], with children aged less than five years found to be the only age group with a negative trend from 1990 to 2010 [7]. The WHO estimates of 2011 suggested that about 273 million children and 42 million pregnant women had anaemia worldwide [6]. According to data by the World Bank, the global prevalence of anaemia in children under five years old reduced steadily from 41.5% in 1990 and then remained steady around 41.5% between 2013 and 2016 [8].

The prevalence of anaemia in children under five years in Africa varies from 9.7% in South eastern Nigeria to 78.4% in Ghana [9, 10]. Existing evidence suggests that severe anaemia, accounting for most anaemia-related deaths, mostly occurs among the under-five years age group, and generally in the rainy season (in the tropics) when the incidence of malaria is at its peak [9]. Furthermore, Brabin *et al* report that mortality due to severe anaemia from malaria is greater than that from iron deficiency anaemia in sub-Saharan Africa [11]. Besides malaria endemicity, poor nutrition, sickle cell disease, late arrival at health facilities, ignorance and poverty also account for high prevalence rates of anaemia in this region [9, 12].

The dearth of current estimates on the prevalence of anaemia in children under five residing in Africa, prompted the need for this study to assess the burden of anaemia among this age group and inform policies aimed at achieving the sustainable development goal 3.2 which has as aim to “end preventable

1  
2  
3 deaths of newborns and children under 5 years of age by 2030” [13]. The aim of this systematic review  
4 is to summarise the prevalence and determinants of anaemia in children aged 6-59 months residing in  
5 Africa.  
6  
7

## 8 **Methods**

### 9 **Criteria for selection of studies for the review**

#### 10 **Inclusion criteria**

- 11 1. Cross-sectional, control arm of randomised controlled trials, case-control and cohort studies  
12 published up to 30 September 2019 with available data to on the prevalence and determinants  
13 of anaemia in children between 6-59 months residing in Africa will be considered
- 14 2. For studies which assessed the determinants of anaemia, only those where adjustment for at  
15 least one exposure variable was done will be eligible for inclusion in our study.
- 16 3. Studies which diagnosed anaemia by measuring haemoglobin concentration using a complete  
17 blood count or hemoglobinometer, and defined anaemia as haemoglobin levels below 11.0 g/dl  
18 according to WHO and the United Nations Children Funds [6]
- 19 4. Studies which defined either mild, moderate or severe anaemia as haemoglobin values of 10.0-  
20 10.9, 7.0-9.9 or less than 7.0 g/dl, respectively [6]
- 21 5. Age limit: children from 6 to 59 months of age
- 22 6. For duplicate publications, only the most recent, comprehensive publication with the largest  
23 sample will be included.  
24  
25  
26  
27  
28  
29  
30  
31  
32  
33  
34  
35  
36  
37  
38

#### 39 **Exclusion criteria**

- 40 1. Reviews, commentaries, letters, case reports and case series with less than 30 participants
- 41 2. Studies conducted in a population with haemoglobinopathies like as sickle cell anaemia.
- 42 3. Studies with no information on the tool used to diagnose anaemia.  
43  
44  
45  
46  
47

#### 48 **Information sources**

#### 49 **Search strategy**

50 We will search for relevant titles and abstracts on anaemia in children aged 6-59 months published in  
51 EMBASE, Web of Science, PubMed, Global Medicus Index, and African Journals Online from  
52 inception to 30 September 2019. Medical subject headings and key text words like ‘anaemia’ OR  
53 ‘anaemia’ OR ‘haemoglobin’ will be combined to a list of the 54 African nations to optimise the  
54 sensitivity of our search, Table 1. The references of eligible full text and relevant reviews will also be  
55  
56  
57  
58  
59  
60

1  
2  
3 screened for potential articles which we missed during our search. We will also search the World  
4 Hematology Congress, International Pediatrics Association Congress, International Conference on  
5 Pediatrics & Primary Care, and International Conference on Pediatrics Health conference proceedings.  
6  
7 Furthermore, ResearchGate will be searched for conference abstracts and articles not cited in the  
8  
9  
10  
11  
12  
13  
14  
15  
16  
17  
18  
19  
20  
21  
22  
23  
24  
25  
26  
27  
28  
29  
30  
31  
32  
33  
34  
35  
36  
37  
38  
39  
40  
41  
42  
43  
44  
45  
46  
47  
48  
49  
50  
51  
52  
53  
54  
55  
56  
57  
58  
59  
60

## Study records

### Data management and study screening

The titles and abstracts of from database searches will be exported to EndNote X9 for removal of  
duplicates. The remaining titles and abstracts will then be exported to the application Rayyan QCRI  
[14] for screening of titles and abstracts. The full text of selected abstracts will be downloaded and  
assessed using the eligibility criteria for final inclusion. The full texts of citations identified through  
bibliographic screening will also be assessed for eligibility before final inclusion. The screening  
process will be independently conducted by two authors and any discrepancies will be resolved  
through discussion until a consensus is reached, otherwise a third author will be called upon for  
arbitration.

### Data items and extraction

A pre-structured Google Form will be used for data abstraction by two authors independently who will  
then crosscheck each other's constituted database for completeness and correctness. Data will be  
extracted on the surname of the first author and the year of publication, the country of study, the region  
of Africa (northern, southern, eastern, western and central), the study area (urban, rural and suburbs),  
study design (cross sectional, cohort), study setting (hospital, school and community-based), sampling  
method (random sampling, consecutive, convenient), timing of data collection (prospective vs  
retrospective), test used to diagnose anaemia (complete blood count or haemoglobinometer), male  
proportion, mean or median age in months, sample size, number of participants with anaemia, number  
of male participants, number of males with anaemia, number of female participants, number of females  
with anaemia, number of participants with mild anaemia, number of male participants with mild  
anaemia, number of female participants with mild anaemia, number of participants with moderate,  
number of male participants with moderate anaemia, number of female participants with moderate  
anaemia, number of participants with severe anaemia, number of male participants with severe  
anaemia, number of female participants with severe anaemia. In addition, we will extract data on the  
measure of association (adjusted odds ratio, relative risk, correlation coefficient) of the determinants  
of anaemia.



1  
2  
3 Where possible, data for multinational studies will be separated reported according to the country  
4 where the study was conducted. Else, they will be reported as a single study, and the countries where  
5 the study was conducted will be highlighted.  
6  
7

### 8 9 **Assessment of methodological quality and risk of bias**

10  
11 Quality assessment of the included studies will be conducted simultaneously with the process of data  
12 abstraction. An adapted version of the Hoy *et al* [15] tool will be used to assess the risk of bias of  
13 prevalence studies, **Supplementary Table 1**. Risk of bias will be totalled on 10 and scores of 0 – 4, 5  
14 – 7 and 8 – 10 will represent low moderate and high risk of bias, respectively. The Newcastle Ottawa  
15 Scale [16] will be used to assess the quality of case-control and cohort studies, **Supplementary Table**  
16  
17 **2 and 3**.  
18  
19

### 20 21 **Data synthesis and analysis**

22  
23 The ‘meta’ package of the statistical software R (version 3.5.3, The R Foundation for statistical  
24 computing, Vienna, Austria) will be used for data analysis. The Cohen k statistics will be used to  
25 evaluate inter-rater agreement between authors for study inclusion, data abstraction and assessment of  
26 study quality [17]. The numerators and denominators of variables of interest from each individual  
27 study will be used to calculate the study-specific prevalence estimates before pooling using random  
28 effect models. Before pooling, the Freeman-Tukey double arcsine transformation will be used to  
29 stabilise the variance of each study-specific estimate [18]. The  $\chi^2$  test on Cochran’s Q statistics, and  
30  $I^2$  will be used to assess and quantify heterogeneity across studies, respectively [19].  $I^2$  values of 70%  
31 or over will be consider to be evidence of substantial heterogeneity [20]. Prevalence estimates will be  
32 pooled according to the different Africa regions, and the Q-test of analysis of variance will be used to  
33 compare the pooled estimates. Publication bias will be assessed visually using funnel plots for  
34 asymmetry and confirmed statistically using the Egger’s test [20]. P values below 10% on Egger’s test  
35 will be considered statistically significant for publication bias.  
36  
37  
38  
39  
40  
41  
42  
43  
44  
45  
46

47  
48 In case of substantial heterogeneity across studies, a subgroup analysis will be conducted with the  
49 following variables: study region (North Africa [northern] vs sub-Saharan Africa [southern, western,  
50 central and eastern]), study setting (hospital-based, school-based and community-based), gender (Male  
51 vs Female) study area (rural, urban, suburb), random sampling (Yes/No), publication year (On or after  
52 2009 vs before 2009), and age groups. A sensitivity analysis including only studies with low risk of  
53 bias will be performed to estimate the prevalence of anaemia.  
54  
55  
56  
57  
58  
59  
60



1  
2  
3 Multiple meta-regression analysis using backward elimination will be used to assess the impact of age,  
4 gender, publication year, study region (North Africa [northern] vs sub-Saharan Africa [southern,  
5 western, central and eastern]), study area (rural, urban, suburb), study sampling (random vs non-  
6 random), study setting (hospital, school and community-based), and year of publication on the overall  
7 summary proportion. Only variables with p values <0.25 on bivariate analysis will be included in the  
8 multiple regression model. Two-sided p-values less than 5% will be considered statistically significant.  
9

10  
11  
12 Data on the determinants of anaemia will be synthesized using narrative summaries and tables.  
13

### 14 15 16 **Patient and public involvement**

17  
18  
19 Patients and/or the public were not directly involved in this study.  
20  
21

### 22 23 **Presentation and reporting of results**

24  
25 The Preferred Reporting Items for Systematic Reviews and Meta-Analyses 2009 statement [21] will  
26 be used to publish this review. The process of study screening and selection will be reported with the  
27 aid of a flow diagram depicting the reason(s) of study exclusion. Prevalence measures will be displayed  
28 using forest plots and tables, while the determinants of anaemia and risk of bias assessment will be  
29 presented as narrative summaries and using tables.  
30  
31

### 32 33 34 **Protocol amendments**

35  
36 The authors do not plan to modify this protocol. Nevertheless, subsequent revisions in the study review  
37 will be carefully reported.  
38  
39

40  
41 **Contributors:** Study conception: VNA; Designed the protocol: LPS, VNA; Drafted the protocol:  
42 LPS, VNA; Protocol revision: EA, DSME, ENM, CEL, KNN, BAK Critical revision: DM. VNA is  
43 the guarantor of this review.  
44  
45

46  
47  
48 **Competing interest:** None declared.  
49

50  
51  
52 **Funding:** This research received no specific grant from any funding agency in the public, commercial  
53 or not-for-profit sectors.  
54  
55

### 56 57 **Data sharing statement**

58  
59 No additional data are available  
60

## References

1. Welcome to CDC stacks | Worldwide prevalence of anaemia 1993-2005; WHO Global Database of anaemia - 5351 | Stephen B. Thacker CDC Library collection. <https://stacks.cdc.gov/view/cdc/5351>. Accessed 17 Apr 2019.
2. Mbanya D, Tayou Tagny C, Mboka C, Tetanye E. Clinical indices of severe anaemia requiring transfusion in young children aged 0 – 5 years: Guidelines for resource-limited settings. *Afr Sang*. 2008;2:1–4.
3. Scott SP, Chen-Edinboro LP, Caulfield LE, Murray-Kolb LE. The Impact of Anemia on Child Mortality: An Updated Review. *Nutrients*. 2014;6:5915–32.
4. Lozoff B, Beard J, Connor J, Felt B, Georgieff M, Schallert T. Long-Lasting Neural and Behavioral Effects of Iron Deficiency in Infancy. *Nutr Rev*. 2006;64 5 Pt 2:S34–91.
5. Santos JN, Rates SPM, Lemos SMA, Lamounier JA. Consequences of anemia on language development of children from a public day care center. *Rev Paul Pediatr*. 2009;27:67–73.
6. World Health Organization. Haemoglobin concentrations for the diagnosis of anaemia and assessment of severity. <https://apps.who.int/iris/handle/10665/85839>.
7. Kassebaum NJ, Jasrasaria R, Naghavi M, Wulf SK, Johns N, Lozano R, et al. A systematic analysis of global anemia burden from 1990 to 2010. *Blood*. 2014;123:615–24.
8. Prevalence of anemia among children (% of children under 5) | Data. <https://data.worldbank.org/indicator/SH.ANM.CHLD.ZS>. Accessed 5 Sep 2019.
9. Muoneke VU, Chidilbekwe R. Prevalence and Aetiology of Severe Anaemia in Under-5 Children in Abakaliki South Eastern Nigeria. 2011.
10. Ewusie JE, Ahiadeke C, Beyene J, Hamid JS. Prevalence of anemia among under-5 children in the Ghanaian population: estimates from the Ghana demographic and health survey. *BMC Public Health*. 2014;14:626.
11. Brabin BJ, Premji Z, Verhoeff F. An Analysis of Anemia and Child Mortality. *J Nutr*. 2001;131:636S–648S.
12. Mbanya D, Tagny CT, Akamba A, Mekongo MO, Tetanye E. [Causes of anaemia in African children aged 5 to 10 years]. *Sante Montrouge Fr*. 2008;18:227–30.
13. WHO | Sustainable Development Goal 3: Health. WHO. <http://www.who.int/topics/sustainable-development-goals/targets/en/>. Accessed 3 May 2019.
14. Ouzzani M, Hammady H, Fedorowicz Z, Elmagarmid A. Rayyan—a web and mobile app for systematic reviews. *Syst Rev*. 2016;5:210.

- 1  
2  
3 15. Hoy D, Brooks P, Woolf A, Blyth F, March L, Bain C, et al. Assessing risk of bias in prevalence  
4 studies: modification of an existing tool and evidence of interrater agreement. *J Clin Epidemiol.*  
5 2012;65:934–9.  
6  
7  
8 16. Wells G, Shea B, O’Connell D, Peterson J, Losos M, Tugwell P. The Newcastle-Ottawa Scale  
9 (NOS) for assessing the quality of nonrandomised studies in meta-analyses. 2011.  
10 [http://www.ohri.ca/programs/clinical\\_epidemiology/oxford.asp](http://www.ohri.ca/programs/clinical_epidemiology/oxford.asp). Accessed 8 Sep 2019.  
11  
12 17. McHugh ML. Interrater reliability: the kappa statistic. *Biochem Medica Biochem Medica.*  
13 2012;22:276–82.  
14  
15 18. Miller JJ. The Inverse of the Freeman – Tukey Double Arcsine Transformation. *Am Stat.*  
16 1978;32:138–138.  
17  
18 19. Cochran WG. The Combination of Estimates from Different Experiments. *Biometrics.*  
19 1954;10:101–29.  
20  
21 20. Egger M, Smith GD, Schneider M, Minder C. Bias in meta-analysis detected by a simple,  
22 graphical test. *BMJ.* 1997;315:629–34.  
23  
24 21. Liberati A, Altman DG, Tetzlaff J, Mulrow C, Gøtzsche PC, Ioannidis JPA, et al. The PRISMA  
25 Statement for Reporting Systematic Reviews and Meta-Analyses of Studies That Evaluate Health  
26 Care Interventions: Explanation and Elaboration. *PLOS Med.* 2009;6:e1000100.  
27  
28  
29  
30  
31

## 32 **List of tables**

33  
34  
35 Table 1: Search Strategy for PubMed

36  
37 Supplementary Table 1: Risk of bias assessment checklist for prevalence studies (adapted from Hoy  
38 et al)  
39

40  
41 Supplementary Table 2: Risk of bias assessment checklist for risk factor studies using the Newcastle  
42 Ottawa Scale.  
43  
44  
45  
46  
47  
48  
49  
50  
51  
52  
53  
54  
55  
56  
57  
58  
59  
60

| SN | Search Items                                                                                                                                                                                                                                                                                                                                                                                                                                                                                                                                                                                                                                                                                                                                                                                                                                                                                                                                                                                                                                                                                                                                                                                                                                                                                                                                                                                                                                                                                                                                                                                                                                                                                                                                                                                                                                                                                                                                                                                                     | Hits |
|----|------------------------------------------------------------------------------------------------------------------------------------------------------------------------------------------------------------------------------------------------------------------------------------------------------------------------------------------------------------------------------------------------------------------------------------------------------------------------------------------------------------------------------------------------------------------------------------------------------------------------------------------------------------------------------------------------------------------------------------------------------------------------------------------------------------------------------------------------------------------------------------------------------------------------------------------------------------------------------------------------------------------------------------------------------------------------------------------------------------------------------------------------------------------------------------------------------------------------------------------------------------------------------------------------------------------------------------------------------------------------------------------------------------------------------------------------------------------------------------------------------------------------------------------------------------------------------------------------------------------------------------------------------------------------------------------------------------------------------------------------------------------------------------------------------------------------------------------------------------------------------------------------------------------------------------------------------------------------------------------------------------------|------|
| 1. | (((Africa* [tiab] OR Algeria [tiab] OR Angola [tiab] OR Benin [tiab] OR Botswana [tiab] OR "Burkina Faso" [tiab] OR Burundi [tiab] OR Cameroon [tiab] OR "Canary Islands" [tiab] OR "Cape Verde" [tiab] OR "Central African Republic" [tiab] OR Chad [tiab] OR Comoros [tiab] OR Congo [tiab] OR "Democratic Republic of Congo" [tiab] OR Djibouti [tiab] OR Egypt [tiab] OR "Equatorial Guinea" [tiab] OR Eritrea [tiab] OR Ethiopia [tiab] OR Gabon [tiab] OR Gambia [tiab] OR Ghana [tiab] OR Guinea [tiab] OR "Guinea Bissau" [tiab] OR "Ivory Coast" [tiab] OR "Cote d'Ivoire" [tiab] OR Jamahiriya [tiab] OR Kenya [tiab] OR Lesotho [tiab] OR Liberia [tiab] OR Libya [tiab] OR Madagascar [tiab] OR Malawi [tiab] OR Mali [tiab] OR Mauritania [tiab] OR Mauritius [tiab] OR Mayotte [tiab] OR Morocco [tiab] OR Mozambique [tiab] OR Namibia [tiab] OR Niger [tiab] OR Nigeria [tiab] OR Principe [tiab] OR Reunion [tiab] OR Rwanda [tiab] OR "Sao Tome" [tiab] OR Senegal [tiab] OR Seychelles [tiab] OR "Sierra Leone" [tiab] OR Somalia [tiab] OR "South Africa" [tiab] OR "South Sudan" [tiab] OR "St Helena" [tiab] OR Sudan [tiab] OR Swaziland [tiab] OR Tanzania [tiab] OR Togo [tiab] OR Tunisia [tiab] OR Uganda [tiab] OR "Western Sahara" [tiab] OR Zaire [tiab] OR Zambia [tiab] OR Zimbabwe [tiab] OR "Central Africa" [tiab] OR "Central African" [tiab] OR "West Africa" [tiab] OR "West African" [tiab] OR "Western Africa" [tiab] OR "Western African" [tiab] OR "East Africa" [tiab] OR "East African" [tiab] OR "Eastern Africa" [tiab] OR "Eastern African" [tiab] OR "North Africa" [tiab] OR "North African" [tiab] OR "Northern Africa" [tiab] OR "Northern African" [tiab] OR "South African" [tiab] OR "Southern Africa" [tiab] OR "Southern African" [tiab] OR "sub Saharan Africa" [tiab] OR "sub Saharan African" [tiab] OR "subSaharan Africa" [tiab] OR "subSaharan African" [tiab]) NOT ("guinea pig" [tiab] OR "guinea pigs" [tiab] OR "aspergillus niger [tiab]")))) |      |
| 2. | 'anemia' OR 'anaemia' OR 'anemias' OR 'anaemias' OR 'hemoglobin' OR 'haemoglobin'                                                                                                                                                                                                                                                                                                                                                                                                                                                                                                                                                                                                                                                                                                                                                                                                                                                                                                                                                                                                                                                                                                                                                                                                                                                                                                                                                                                                                                                                                                                                                                                                                                                                                                                                                                                                                                                                                                                                |      |
| 3. | #1 AND #2                                                                                                                                                                                                                                                                                                                                                                                                                                                                                                                                                                                                                                                                                                                                                                                                                                                                                                                                                                                                                                                                                                                                                                                                                                                                                                                                                                                                                                                                                                                                                                                                                                                                                                                                                                                                                                                                                                                                                                                                        |      |
| 4. | (("Child, Preschool"[Mesh]) AND "Infant"[Mesh])                                                                                                                                                                                                                                                                                                                                                                                                                                                                                                                                                                                                                                                                                                                                                                                                                                                                                                                                                                                                                                                                                                                                                                                                                                                                                                                                                                                                                                                                                                                                                                                                                                                                                                                                                                                                                                                                                                                                                                  |      |
| 5. | #3 AND #4                                                                                                                                                                                                                                                                                                                                                                                                                                                                                                                                                                                                                                                                                                                                                                                                                                                                                                                                                                                                                                                                                                                                                                                                                                                                                                                                                                                                                                                                                                                                                                                                                                                                                                                                                                                                                                                                                                                                                                                                        |      |

|    |                                                                                                      |  |
|----|------------------------------------------------------------------------------------------------------|--|
| 6. | Publication date limits: from database inception to 30 September 2019, with no language restrictions |  |
|----|------------------------------------------------------------------------------------------------------|--|

Table 1: Search Strategy for PubMed

For peer review only

## Supplementary Table 1: Risk of bias assessment checklist for prevalence studies (adapted from Hoy et al)

| Name of author(s):                                                                                                                                            |                                                                                                                                                                                                                                               |               |
|---------------------------------------------------------------------------------------------------------------------------------------------------------------|-----------------------------------------------------------------------------------------------------------------------------------------------------------------------------------------------------------------------------------------------|---------------|
| Year of publication:                                                                                                                                          |                                                                                                                                                                                                                                               |               |
| Study title:                                                                                                                                                  |                                                                                                                                                                                                                                               |               |
| Risk of bias items                                                                                                                                            | Risk of bias levels                                                                                                                                                                                                                           | Points scored |
| 1. Was the study's target population a close representation of the national population in relation to relevant variables, e.g. age, sex, occupation?          | <b>Yes (LOW RISK):</b> The study's target population was a close representation of the national population.                                                                                                                                   | 0             |
|                                                                                                                                                               | <b>No (HIGH RISK):</b> The study's target population was clearly NOT representative of the national population.                                                                                                                               | 1             |
| 2. Was the sampling frame a true or close representation of the target population?                                                                            | <b>Yes (LOW RISK):</b> The sampling frame was a true or close representation of the target population.                                                                                                                                        | 0             |
|                                                                                                                                                               | <b>No (HIGH RISK):</b> The sampling frame was NOT a true or close representation of the target population.                                                                                                                                    | 1             |
| 3. Was some form of random selection used to select the sample, OR, was a census undertaken?                                                                  | <b>Yes (LOW RISK):</b> A census was undertaken, OR, some form of random selection was used to select the sample (e.g. simple random sampling, stratified random sampling, cluster sampling, systematic sampling).                             | 0             |
|                                                                                                                                                               | <b>No (HIGH RISK):</b> A census was NOT undertaken, AND some form of random selection was NOT used to select the sample.                                                                                                                      | 1             |
| 4. Was the likelihood of non-response bias minimal?                                                                                                           | <b>Yes (LOW RISK):</b> The response rate for the study was $\geq 75\%$ , OR, an analysis was performed that showed no significant difference in relevant demographic characteristics between responders and non- responders                   | 0             |
|                                                                                                                                                               | <b>No (HIGH RISK):</b> The response rate was $<75\%$ , and if any analysis comparing responders and non-responders was done, it showed a significant difference in relevant demographic characteristics between responders and non-responders | 1             |
| 5. Were data collected directly from the subjects (as opposed to a proxy)?                                                                                    | <b>Yes (LOW RISK):</b> All data were collected directly from the subjects.                                                                                                                                                                    | 0             |
|                                                                                                                                                               | <b>No (HIGH RISK):</b> In some instances, data were collected from a proxy.                                                                                                                                                                   | 1             |
| 6. Was an acceptable case definition used in the study?                                                                                                       | <b>Yes (LOW RISK):</b> An acceptable case definition was used.                                                                                                                                                                                | 0             |
|                                                                                                                                                               | <b>No (HIGH RISK):</b> An acceptable case definition was NOT used                                                                                                                                                                             | 1             |
| 7. Was the study instrument that measured the parameter of interest (e.g. prevalence of low back pain) shown to have reliability and validity (if necessary)? | <b>Yes (LOW RISK):</b> The study instrument had been shown to have reliability and validity (if this was necessary), e.g. test-re- test, piloting, validation in a previous study, etc.                                                       | 0             |
|                                                                                                                                                               | <b>No (HIGH RISK):</b> The study instrument had NOT been shown to have reliability or validity (if this was necessary).                                                                                                                       | 1             |
| 8. Was the same mode of data collection used for all subjects?                                                                                                | <b>Yes (LOW RISK):</b> The same mode of data collection was used for all subjects.                                                                                                                                                            | 0             |
|                                                                                                                                                               | <b>No (HIGH RISK):</b> The same mode of data collection was NOT used for all subjects.                                                                                                                                                        | 1             |
| 9. Was the length of the shortest prevalence period for the parameter of interest appropriate?                                                                | <b>Yes (LOW RISK):</b> The length of the shortest prevalence period for the parameter of interest was appropriate.                                                                                                                            | 0             |
|                                                                                                                                                               | <b>No (HIGH RISK):</b> the length of the shortest prevalence period for the parameter of interest was NOT appropriate.                                                                                                                        | 1             |
| 10. Were the numerator(s) and denominator(s) for the parameter of interest appropriate                                                                        | <b>Yes (LOW RISK):</b> The paper presented appropriate numerator(s) AND denominator(s) for the parameter of interest (e.g. the prevalence of low back pain).                                                                                  | 0             |
|                                                                                                                                                               | <b>No (HIGH RISK):</b> The paper did present numerator(s) AND denominator(s) for the parameter of interest but one or more of these were inappropriate.                                                                                       | 1             |
| <b>Summary on the overall risk of study bias</b>                                                                                                              | <b>LOW RISK</b>                                                                                                                                                                                                                               | 0-4           |
|                                                                                                                                                               | <b>MODERATE RISK</b>                                                                                                                                                                                                                          | 5-7           |
|                                                                                                                                                               | <b>HIGH RISK</b>                                                                                                                                                                                                                              | 8-10          |

**Supplementary Table 2. NEWCASTLE - OTTAWA QUALITY ASSESSMENT SCALE  
CASE CONTROL STUDIES**

Note: A study can be awarded a maximum of one star for each numbered item within the Selection and Exposure categories. A maximum of two stars can be given for Comparability.

| No                   | Criterion                                                                  | Decision rule                                                                                                                                                                                               | Score (* = 1, No* = 0) |
|----------------------|----------------------------------------------------------------------------|-------------------------------------------------------------------------------------------------------------------------------------------------------------------------------------------------------------|------------------------|
| <b>Selection</b>     |                                                                            |                                                                                                                                                                                                             |                        |
| 1.                   | Is the case definition adequate?                                           | a) yes, with independent validation *<br>b) yes, eg record linkage or based on self reports<br>c) no description                                                                                            |                        |
| 2.                   | Representativeness of the cases                                            | a) consecutive or obviously representative series of cases *<br>b) potential for selection biases or not stated                                                                                             |                        |
| 3.                   | Selection of Controls                                                      | a) community controls *<br>b) hospital controls<br>c) no description                                                                                                                                        |                        |
| 4.                   | Definition of Controls                                                     | a) no history of disease (endpoint) *<br>b) no description of source                                                                                                                                        |                        |
| <b>Comparability</b> |                                                                            |                                                                                                                                                                                                             |                        |
| 1.                   | Comparability of cases and controls on the basis of the design or analysis | a) study controls for age *<br>b) study controls for gender *                                                                                                                                               |                        |
| <b>Exposure</b>      |                                                                            |                                                                                                                                                                                                             |                        |
| 1.                   | Ascertainment of exposure                                                  | a) secure record *<br>b) structured interview where blind to case/control status *<br>c) interview not blinded to case/control status<br>d) written self report or medical record only<br>e) no description |                        |
| 2.                   | Same method of ascertainment for cases and controls                        | a) Yes *<br>b) No                                                                                                                                                                                           |                        |
| 3.                   | Non-Response rate                                                          | a) same rate for both groups *<br>b) non respondents described<br>c) rate different and no designation                                                                                                      |                        |
| Score                |                                                                            |                                                                                                                                                                                                             |                        |

### Supplementary Table 3. NEWCASTLE - OTTAWA QUALITY ASSESSMENT SCALE COHORT STUDIES

**Note:** A study can be awarded a maximum of one star for each numbered item within the Selection and Outcome categories. A maximum of two stars can be given for Comparability

| No                   | Criterion                                                                | Decision rule                                                                                                                                                                                                                                                                  | Score (* = 1, No* = 0) |
|----------------------|--------------------------------------------------------------------------|--------------------------------------------------------------------------------------------------------------------------------------------------------------------------------------------------------------------------------------------------------------------------------|------------------------|
| <b>Selection</b>     |                                                                          |                                                                                                                                                                                                                                                                                |                        |
| 1.                   | Representativeness of the exposed cohort                                 | a) Consecutive eligible participants were selected, participants were randomly selected, or all participants were invited to participate from the source population*<br>b) Not satisfying requirements in part (a), or not stated.                                             |                        |
| 2.                   | Selection of the non-exposed cohort                                      | a) Selected from the same source population*<br>b) Selected from a different source population<br>c) No description                                                                                                                                                            |                        |
| 3.                   | Ascertainment of exposure                                                | a) secure record (eg surgical records) *<br>b) structured interview *<br>c) written self report<br>d) no description                                                                                                                                                           |                        |
| 4.                   | Demonstration that outcome of interest was not present at start of study | a) Yes *<br>b) No                                                                                                                                                                                                                                                              |                        |
| <b>Comparability</b> |                                                                          |                                                                                                                                                                                                                                                                                |                        |
| 1.                   | Comparability of cohorts on the basis of the design or analysis          | a) study controls for age*<br>b) study controls for gender *                                                                                                                                                                                                                   |                        |
| <b>Outcome</b>       |                                                                          |                                                                                                                                                                                                                                                                                |                        |
| 1.                   | Assessment of outcome                                                    | a) independent blind assessment *<br>b) record linkage *<br>c) self report<br>d) no description                                                                                                                                                                                |                        |
| 2.                   | Was follow-up long enough for outcomes to occur                          | a) Yes *<br>b) No                                                                                                                                                                                                                                                              |                        |
| 3.                   | Adequacy of follow up of cohorts                                         | a) complete follow up - all subjects accounted for *<br>b) subjects lost to follow up unlikely to introduce bias - small number lost (< 15% follow up, or description provided of those lost) *<br>c) follow up rate < 85% and no description of those lost<br>d) no statement |                        |
| Score                |                                                                          |                                                                                                                                                                                                                                                                                |                        |



**PRISMA-P (Preferred Reporting Items for Systematic review and Meta-Analysis Protocols) 2015 checklist: recommended items to address in a systematic review protocol**

| Section and topic                 | Item No | Checklist item                                                                                                                                                                                                                | Page #     |
|-----------------------------------|---------|-------------------------------------------------------------------------------------------------------------------------------------------------------------------------------------------------------------------------------|------------|
| <b>ADMINISTRATIVE INFORMATION</b> |         |                                                                                                                                                                                                                               |            |
| Title:                            |         |                                                                                                                                                                                                                               |            |
| Identification                    | 1a      | Identify the report as a protocol of a systematic review                                                                                                                                                                      | 1          |
| Update                            | 1b      | If the protocol is for an update of a previous systematic review, identify as such                                                                                                                                            | NA         |
| Registration                      | 2       | If registered, provide the name of the registry (such as PROSPERO) and registration number                                                                                                                                    | 3          |
| Authors:                          |         |                                                                                                                                                                                                                               |            |
| Contact                           | 3a      | Provide name, institutional affiliation, e-mail address of all protocol authors; provide physical mailing address of corresponding author                                                                                     | 1          |
| Contributions                     | 3b      | Describe contributions of protocol authors and identify the guarantor of the review                                                                                                                                           | 13         |
| Amendments                        | 4       | If the protocol represents an amendment of a previously completed or published protocol, identify as such and list changes; otherwise, state plan for documenting important protocol amendments                               | 11         |
| Support:                          |         |                                                                                                                                                                                                                               |            |
| Sources                           | 5a      | Indicate sources of financial or other support for the review                                                                                                                                                                 | 13         |
| Sponsor                           | 5b      | Provide name for the review funder and/or sponsor                                                                                                                                                                             | NA         |
| Role of sponsor or funder         | 5c      | Describe roles of funder(s), sponsor(s), and/or institution(s), if any, in developing the protocol                                                                                                                            | NA         |
| <b>INTRODUCTION</b>               |         |                                                                                                                                                                                                                               |            |
| Rationale                         | 6       | Describe the rationale for the review in the context of what is already known                                                                                                                                                 | 4          |
| Objectives                        | 7       | Provide an explicit statement of the question(s) the review will address with reference to participants, interventions, comparators, and outcomes (PICO)                                                                      | 5          |
| <b>METHODS</b>                    |         |                                                                                                                                                                                                                               |            |
| Eligibility criteria              | 8       | Specify the study characteristics (such as PICO, study design, setting, time frame) and report characteristics (such as years considered, language, publication status) to be used as criteria for eligibility for the review | 5-6        |
| Information sources               | 9       | Describe all intended information sources (such as electronic databases, contact with study authors, trial registers or other grey literature sources) with planned dates of coverage                                         | 6-7        |
| Search strategy                   | 10      | Present draft of search strategy to be used for at least one electronic database, including planned limits, such that it could be repeated                                                                                    | 6, Table 1 |
| Study records:                    |         |                                                                                                                                                                                                                               |            |
| Data                              | 11a     | Describe the mechanism(s) that will be used to manage records and data throughout the review                                                                                                                                  | 7          |

|                                    |     |                                                                                                                                                                                                                                                  |      |
|------------------------------------|-----|--------------------------------------------------------------------------------------------------------------------------------------------------------------------------------------------------------------------------------------------------|------|
| management                         |     |                                                                                                                                                                                                                                                  |      |
| Selection process                  | 11b | State the process that will be used for selecting studies (such as two independent reviewers) through each phase of the review (that is, screening, eligibility and inclusion in meta-analysis)                                                  | 7    |
| Data collection process            | 11c | Describe planned method of extracting data from reports (such as piloting forms, done independently, in duplicate), any processes for obtaining and confirming data from investigators                                                           | 8    |
| Data items                         | 12  | List and define all variables for which data will be sought (such as PICO items, funding sources), any pre-planned data assumptions and simplifications                                                                                          | 8    |
| Outcomes and prioritization        | 13  | List and define all outcomes for which data will be sought, including prioritization of main and additional outcomes, with rationale                                                                                                             | 8    |
| Risk of bias in individual studies | 14  | Describe anticipated methods for assessing risk of bias of individual studies, including whether this will be done at the outcome or study level, or both; state how this information will be used in data synthesis                             | 9    |
| Data synthesis                     | 15a | Describe criteria under which study data will be quantitatively synthesised                                                                                                                                                                      | 9-10 |
|                                    | 15b | If data are appropriate for quantitative synthesis, describe planned summary measures, methods of handling data and methods of combining data from studies, including any planned exploration of consistency (such as $I^2$ , Kendall's $\tau$ ) | 9-10 |
|                                    | 15c | Describe any proposed additional analyses (such as sensitivity or subgroup analyses, meta-regression)                                                                                                                                            | 10   |
|                                    | 15d | If quantitative synthesis is not appropriate, describe the type of summary planned                                                                                                                                                               | 10   |
| Meta-bias(es)                      | 16  | Specify any planned assessment of meta-bias(es) (such as publication bias across studies, selective reporting within studies)                                                                                                                    | 9    |
| Confidence in cumulative evidence  | 17  | Describe how the strength of the body of evidence will be assessed (such as GRADE)                                                                                                                                                               | NA   |

# BMJ Open

## Prevalence and determinants of anaemia in children aged 6 to 59 months in Africa: a protocol for systematic review and meta-analysis

|                                 |                                                                                                                                                                                                                                                                                                                                                                                                                                                                                                                                                                                                                                                                                                                                                                                                                                                                                         |
|---------------------------------|-----------------------------------------------------------------------------------------------------------------------------------------------------------------------------------------------------------------------------------------------------------------------------------------------------------------------------------------------------------------------------------------------------------------------------------------------------------------------------------------------------------------------------------------------------------------------------------------------------------------------------------------------------------------------------------------------------------------------------------------------------------------------------------------------------------------------------------------------------------------------------------------|
| Journal:                        | <i>BMJ Open</i>                                                                                                                                                                                                                                                                                                                                                                                                                                                                                                                                                                                                                                                                                                                                                                                                                                                                         |
| Manuscript ID                   | bmjopen-2019-032042.R2                                                                                                                                                                                                                                                                                                                                                                                                                                                                                                                                                                                                                                                                                                                                                                                                                                                                  |
| Article Type:                   | Protocol                                                                                                                                                                                                                                                                                                                                                                                                                                                                                                                                                                                                                                                                                                                                                                                                                                                                                |
| Date Submitted by the Author:   | 06-Dec-2019                                                                                                                                                                                                                                                                                                                                                                                                                                                                                                                                                                                                                                                                                                                                                                                                                                                                             |
| Complete List of Authors:       | Simo, Larissa Pone ; Faculty of Health Sciences, University of Bamenda, Bamenda, Cameroon<br>Agbor, Ndip; Ibal sub-Divisional Hospital, General practice<br>AgborNdip, Ettamba; Health Education and Research Organization (HERO), Department of Clinical Research<br>Ekaney, Domin Sone ; Health Education and Research Organization (HERO), Department of Clinical Research<br>Mbeng , Emmanuel ; Health Education and Research Organization (HERO), Department of Clinical Research<br>Linonge, Christie ; Health Education and Research Organization (HERO), Department of Clinical Research<br>Neba , Kilton ; Health Education and Research Organization (HERO), Department of Clinical Research<br>Kemah, Ben-Lawrence ; Health Education and Research Organization (HERO), Department of Clinical Research<br>Mbanya , Dora ; University of Bamenda, Faculty of Health Sciences |
| <b>Primary Subject Heading</b>: | Epidemiology                                                                                                                                                                                                                                                                                                                                                                                                                                                                                                                                                                                                                                                                                                                                                                                                                                                                            |
| Secondary Subject Heading:      | Paediatrics, Global health                                                                                                                                                                                                                                                                                                                                                                                                                                                                                                                                                                                                                                                                                                                                                                                                                                                              |
| Keywords:                       | Anaemia < HAEMATOLOGY, Child, Infant, Africa                                                                                                                                                                                                                                                                                                                                                                                                                                                                                                                                                                                                                                                                                                                                                                                                                                            |
|                                 |                                                                                                                                                                                                                                                                                                                                                                                                                                                                                                                                                                                                                                                                                                                                                                                                                                                                                         |

SCHOLARONE™  
Manuscripts



I, the Submitting Author has the right to grant and does grant on behalf of all authors of the Work (as defined in the below author licence), an exclusive licence and/or a non-exclusive licence for contributions from authors who are: i) UK Crown employees; ii) where BMJ has agreed a CC-BY licence shall apply, and/or iii) in accordance with the terms applicable for US Federal Government officers or employees acting as part of their official duties; on a worldwide, perpetual, irrevocable, royalty-free basis to BMJ Publishing Group Ltd ("BMJ") its licensees and where the relevant Journal is co-owned by BMJ to the co-owners of the Journal, to publish the Work in this journal and any other BMJ products and to exploit all rights, as set out in our [licence](#).

The Submitting Author accepts and understands that any supply made under these terms is made by BMJ to the Submitting Author unless you are acting as an employee on behalf of your employer or a postgraduate student of an affiliated institution which is paying any applicable article publishing charge ("APC") for Open Access articles. Where the Submitting Author wishes to make the Work available on an Open Access basis (and intends to pay the relevant APC), the terms of reuse of such Open Access shall be governed by a Creative Commons licence – details of these licences and which [Creative Commons](#) licence will apply to this Work are set out in our licence referred to above.

Other than as permitted in any relevant BMJ Author's Self Archiving Policies, I confirm this Work has not been accepted for publication elsewhere, is not being considered for publication elsewhere and does not duplicate material already published. I confirm all authors consent to publication of this Work and authorise the granting of this licence.

## Prevalence and determinants of anaemia in children aged 6 to 59 months in Africa: a protocol for systematic review and meta-analysis

**Authors:** Larissa Simo Pone <sup>1,2</sup>; Valirie Ndip Agbor <sup>3,4\*</sup>; Ettamba AgborNdip <sup>4,5</sup>; Domin Sone M. Ekaney <sup>2,4,6</sup>; Emmanuel Njang Mbeng <sup>4</sup>; Christie Etom Linonge <sup>2,4</sup>; Kilton Nforchu Neba <sup>4,6</sup>; Ben-Lawrence Ayong Kemah <sup>4</sup>; Dora Mbanya <sup>1,7</sup>

### Affiliations:

- 1: Faculty of Health Sciences, the University of Bamenda, Cameroon
- 2: Clinical Research Education, Networking & Consultancy (CRENC), Douala, Cameroon
- 3: Nuffield Department of Population Health, University of Oxford, Oxford, United Kingdom
- 4: Department of Clinical Research, Health Education and Research Organization (HERO), Cameroon
- 5: Institute of Child Health, University College London, London, United Kingdom.
- 6: Ecole de Santé Publique, Université Libre de Bruxelles, Bruxelles, Belgium
- 7: Yaoundé University Teaching Hospital (YUTH), Yaoundé, Cameroon.

**Email addresses:** LPS: [ponelarissa@gmail.com](mailto:ponelarissa@gmail.com); VNA: [nvagbor@gmail.com](mailto:nvagbor@gmail.com); EA: [ettamba.agborndip@herocameroon.org](mailto:ettamba.agborndip@herocameroon.org); DSME: [domin.ekaney@herocameroon.org](mailto:domin.ekaney@herocameroon.org); ENM: [njangjr@gmail.com](mailto:njangjr@gmail.com); CEL: [christie.linonge@herocameroon.org](mailto:christie.linonge@herocameroon.org); KNN: [nforchuneba@yahoo.com](mailto:nforchuneba@yahoo.com); BAK: [kbenlawrence@gmail.com](mailto:kbenlawrence@gmail.com); DM: [dmbanya1@yahoo.co.uk](mailto:dmbanya1@yahoo.co.uk)

**\*Corresponding author:** Valirie Ndip Agbor, MD, Email: [nvagbor@gmail.com](mailto:nvagbor@gmail.com). Tel. 00 237 676546548

## Abstract

**Introduction:** Anaemia, especially in children less than five years old, is a global health problem disproportionately affecting populations in low- and middle-income countries. It is associated with high disability and death rates and has a negative effect on development. This study seeks to evaluate the prevalence and determinants of anaemia in children aged 6-59 months residing in Africa.

**Methods and analysis:** This protocol was prepared using the 2015 Preferred Reporting Items for Systematic Reviews and Meta-analyses for Protocols (PRISMA-P) guidelines. Relevant citations will be identified by searching EMBASE, Web of Science, PubMed, Global Medicus Index, and African Journals Online from inception to 30 September 2019 with no language restrictions. Two authors will independently screen and select eligible studies for the review. Random effect meta-analytic methods will be used to pool study-specific estimates and heterogeneity will be assessed and quantified using the  $\chi^2$  test on Cochrane's Q and  $I^2$  statistics, respectively. Publication bias will be evaluated using funnel plots and Egger's test. Subgroup analysis and multiple meta-regression using backward elimination will be performed to account for substantial heterogeneity.

**Ethics and dissemination:** No ethical approval is required for this study as it is based on already published data. The findings of the review will be published in a peer-reviewed journal and presented at conferences.

**Keywords:** Anaemia, child, infant, Africa.

**Word count:** Abstract = 234; main text = 1460

Number of tables =1; Number of figures =0; supplementary files =2

### Strengths and limitations of the study

1. This will be the first systematic review and meta-analysis to estimate the burden of anaemia in children aged 6-59 months living on the African continent.
2. We anticipate substantial heterogeneity in the prevalence of anaemia among published studies in Africa.
3. Nevertheless, appropriate systematic review and robust meta-analytic methods will be used to conduct the review and account for heterogeneity across studies, if any.

## Introduction

Anaemia is a global public health problem associated with high morbidity and mortality rates, increased hospitalisation and a reverse effect on socioeconomic development [1–3]. Anaemia in infancy is associated with long-lasting effects on the brain and behaviour leading to poorer motor, cognitive and social-emotional functions [4, 5]. The World Health Organisation (WHO) currently defines anaemia in children aged 6-59 months as a haemoglobin concentration less than 110g/l [6]. The aetiologies of anaemia could be multifactorial and vary globally depending on geography, age and gender [7]. Nonetheless, Iron Deficiency Anaemia (IDA) is known to be the most important contributing factor to the global burden of the disease [6]. Other aetiologies of anaemia include other nutritional deficiencies (folate, B6, B12), haemoglobinopathies, parasitic infections, as well as acute and chronic inflammation [1, 6]. In a systematic analysis from 1990 to 2010, Kassebaum *et al* reported a rising prevalence of anaemia from malaria, schistosomiasis and chronic kidney disease [7].

In 2010, the global prevalence of anaemia was estimated at 32.9% with the regions of South East Asia, Central, West and East sub-Saharan Africa bearing the greatest burden [7]. Though occurring at different stages in the life, pregnant women and preschool age children have been found to be at greatest risk of developing anaemia [1], with children aged less than five years found to be the only age group with a negative trend from 1990 to 2010 [7]. The WHO estimates of 2011 suggested that about 273 million children and 42 million pregnant women had anaemia worldwide [6]. According to data from the World Bank, the global prevalence of anaemia in children below five years reduced steadily from 41.5% in 1990 and then remained steady around 41.5% between 2013 and 2016 [8].

The prevalence of anaemia in children under five years in Africa varies from 9.7% in South eastern Nigeria to 78.4% in Ghana [9, 10]. Existing evidence suggests that severe anaemia, accounting for most anaemia-related deaths, mostly occurs among children under-five, and generally in the rainy season (in the tropics) when the incidence of malaria is at its peak [9]. Furthermore, mortality from malaria-associated severe anaemia is greater than that from iron deficiency anaemia in sub-Saharan Africa [11]. Besides malaria endemicity, poor nutrition, sickle cell disease, late arrival at health facilities, ignorance and poverty also account for high prevalence rates of anaemia in this region [9, 12].

The dearth of current estimates on the prevalence of anaemia in children under five residing in Africa, prompted the need for this study to assess the burden of anaemia among this age group and inform policies aimed at achieving the sustainable development goal 3.2 which has as aim to “end preventable deaths of newborns and children under 5 years of age by 2030” [13]. The aim of this systematic review

1  
2  
3 is to summarise the prevalence and determinants of anaemia in children aged 6-59 months residing in  
4 Africa.  
5

## 6 7 **Methods**

### 8 9 **Criteria for selection of studies for the review**

#### 10 11 **Inclusion criteria**

- 12  
13 1. Cross-sectional, control arm of randomised controlled trials, case-control and cohort studies  
14  
15 published up to 30 September 2019 with available data to on the prevalence and determinants  
16  
17 of anaemia in children between 6-59 months residing in Africa will be considered  
18  
19
- 20  
21 2. For studies which assessed the determinants of anaemia, only those where adjustment for at  
22  
23 least one exposure variable was done will be eligible for inclusion in our study.
- 24  
25 3. Studies which diagnosed anaemia by measuring haemoglobin concentration using a complete  
26  
27 blood count or hemoglobinometer, and defined anaemia as haemoglobin levels below 11.0 g/dl  
28  
29 according to WHO and the United Nations Children Funds [6]
- 30  
31 4. Studies which defined either mild, moderate or severe anaemia as haemoglobin values of 10.0-  
32  
33 10.9, 7.0-9.9 or less than 7.0 g/dl, respectively [6]
- 34  
35 5. Age limit: children from 6 to 59 months of age
- 36  
37 6. For duplicate publications, only the most recent, comprehensive publication with the largest  
38  
39 sample will be included.

#### 40 41 **Exclusion criteria**

- 42  
43 1. Reviews, commentaries, letters, case reports and case series with less than 30 participants
- 44  
45 2. Studies conducted in a population with haemoglobinopathies like as sickle cell anaemia.
- 46  
47 3. Studies with no information on the tool used to diagnose anaemia.

#### 48 49 **Information sources**

##### 50 51 **Search strategy**

52 We will search for relevant titles and abstracts on anaemia in children aged 6-59 months published in  
53 EMBASE, Web of Science, PubMed, Global Medicus Index, and African Journals Online from  
54 inception to 30 September 2019. Medical subject headings and key text words like ‘anaemia’ OR  
55 ‘anaemia’ OR ‘haemoglobin’ will be combined to a list of the 54 African nations to optimise the  
56 sensitivity of our search, Table 1. The references of eligible full text and relevant reviews will also be  
57 screened for potential articles which we missed during our search. We will also search the World  
58  
59  
60



1  
2  
3 Hematology Congress, International Pediatrics Association Congress, International Conference on  
4 Pediatrics & Primary Care, and International Conference on Pediatrics Health conference proceedings.  
5  
6 Furthermore, ResearchGate will be searched for conference abstracts and articles not cited in the  
7  
8 aforementioned databases.  
9

## 10 **Study records**

### 11 **Data management and study screening**

12  
13 The titles and abstracts of from database searches will be exported to EndNote X9 for removal of  
14  
15 duplicates. The remaining titles and abstracts will then be exported to the application Rayyan QCRI  
16  
17 [14] for screening of titles and abstracts. The full text of selected abstracts will be downloaded and  
18  
19 assessed using the eligibility criteria for final inclusion. The full texts of citations identified through  
20  
21 bibliographic screening will also be assessed for eligibility before final inclusion. The screening  
22  
23 process will be independently conducted by two authors and any discrepancies will be resolved  
24  
25 through discussion until a consensus is reached, otherwise a third author will be called upon for  
26  
27 arbitration.  
28

### 29 **Data items and extraction**

30  
31 A pre-structured Google Form will be used for data abstraction by two authors independently who will  
32  
33 then crosscheck each other's constituted database for completeness and correctness. Data will be  
34  
35 extracted on the surname of the first author and the year of publication, the country of study, the study  
36  
37 area (urban, rural and suburbs), and study design (cross sectional, cohort). The region of Africa where  
38  
39 the study was conducted will be deduced from the country where the study was conducted. We will  
40  
41 also extract data on the study setting (hospital, school and community-based), sampling method  
42  
43 (random sampling, consecutive, convenient), timing of data collection (prospective vs retrospective),  
44  
45 test used to diagnose anaemia (complete blood count or haemoglobinometer), male proportion, mean  
46  
47 or median age in months, and sample size. In addition, we will extract data on number of: participants  
48  
49 with anaemia, males, males with anaemia, females, females with anaemia, participants with mild  
50  
51 anaemia, males with mild anaemia, females with mild anaemia, participants with moderate, males with  
52  
53 moderate anaemia, females with moderate anaemia, participants with severe anaemia, males with  
54  
55 severe anaemia, and females with severe anaemia. Finally, data on the measure of association (adjusted  
56  
57 odds ratio, beta coefficient, and relative risk) of the determinants of anaemia will be extracted.  
58  
59  
60

1  
2  
3 Where possible, data for multinational studies will be separated reported according to the country  
4 where the study was conducted. Else, they will be reported as a single study, and the countries where  
5 the study was conducted will be highlighted.  
6  
7

### 8 9 **Assessment of methodological quality and risk of bias**

10  
11 The two authors who performed data extraction will assess the quality of the included studies. Quality  
12 assessment of the included studies will be conducted simultaneously with the process of data  
13 abstraction. An adapted version of the Hoy *et al* [15] tool will be used to assess the risk of bias of  
14 prevalence studies, **Supplementary Table 1**. Risk of bias will be totalled on 10 and scores of 0 – 4, 5  
15 – 7 and 8 – 10 will represent low moderate and high risk of bias, respectively. The Newcastle Ottawa  
16 Scale [16] will be used to assess the quality of case-control and cohort studies, **Supplementary Table**  
17 **2 and 3**.  
18  
19  
20  
21  
22

### 23 24 **Data synthesis and analysis**

25  
26 The ‘meta’ package of the statistical software R (version 3.5.3, The R Foundation for statistical  
27 computing, Vienna, Austria) will be used for data analysis. The Cohen k statistics will be used to  
28 evaluate inter-rater agreement between authors for study inclusion, data abstraction and assessment of  
29 study quality [17]. The numerators and denominators of variables of interest from each individual  
30 study will be used to calculate the study-specific prevalence estimates before pooling using random  
31 effect models. Before pooling, the Freeman-Tukey double arcsine transformation will be used to  
32 stabilise the variance of each study-specific estimate [18]. The  $\chi^2$  test on Cochrane’s Q statistics, and  
33  $I^2$  will be used to assess and quantify heterogeneity across studies, respectively [19].  $I^2$  values of 70%  
34 or over will be considered as evidence of substantial heterogeneity [20]. Prevalence estimates will be  
35 pooled according to the different Africa regions, and the Q-test of analysis of variance will be used to  
36 compare the pooled estimates. Publication bias will be assessed visually using funnel plots for  
37 asymmetry and confirmed statistically using the Egger’s test [20]. P values below 10% on Egger’s test  
38 will be considered statistically significant for publication bias.  
39  
40  
41  
42  
43  
44  
45  
46  
47  
48

49 In case of substantial heterogeneity across studies, a subgroup analysis will be conducted with the  
50 following variables: study region (North Africa [northern] vs sub-Saharan Africa [southern, western,  
51 central and eastern]), study setting (hospital-based, school-based and community-based), gender (Male  
52 vs Female) study area (rural, urban, suburb), and random sampling (Yes/No). A sensitivity analysis  
53 including only studies with low risk of bias will be performed to estimate the prevalence of anaemia.  
54  
55  
56  
57  
58  
59  
60

1  
2  
3 Multiple meta-regression analysis using backward elimination will be used to assess the impact of age,  
4 gender, publication year, study region (North Africa [northern] vs sub-Saharan Africa [southern,  
5 western, central and eastern]), study area (rural, urban, suburb), study sampling (random vs non-  
6 random), study setting (hospital, school and community-based), and year of publication on the overall  
7 summary proportion. Only variables with p values <0.25 on bivariate analysis will be included in the  
8 multiple regression model. Two-sided p-values less than 5% will be considered statistically significant.  
9

10  
11  
12 Data on the determinants of anaemia will be synthesized using narrative summaries and tables.  
13

### 14 15 16 **Patient and public involvement**

17  
18  
19 Patients and/or the public were not directly involved in this study.  
20

### 21 22 23 **Presentation and reporting of results**

24  
25 The Preferred Reporting Items for Systematic Reviews and Meta-Analyses 2009 statement [21] will  
26 be used to publish this review. The process of study screening and selection will be reported with the  
27 aid of a flow diagram depicting the reason(s) of study exclusion. Prevalence measures will be displayed  
28 using forest plots and tables, while the determinants of anaemia and risk of bias assessment will be  
29 presented as narrative summaries and using tables.  
30  
31

### 32 33 34 **Protocol amendments**

35  
36 The authors do not plan to modify this protocol. Nevertheless, subsequent revisions in the study review  
37 will be carefully reported.  
38

39  
40 **Contributors:** Study conception: VNA; Designed the protocol: LPS, VNA; Drafted the protocol:  
41 LPS, VNA; Protocol revision: EA, DSME, ENM, CEL, KNN, BAK Critical revision: DM. VNA is  
42 the guarantor of this review.  
43  
44  
45

46  
47  
48 **Competing interest:** None declared.  
49

50  
51 **Funding:** This research received no specific grant from any funding agency in the public, commercial  
52 or not-for-profit sectors.  
53  
54

### 55 56 57 **Data sharing statement**

58  
59 No additional data are available  
60

1  
2  
3  
4  
5  
6  
7  
8  
9  
10  
11  
12  
13  
14  
15  
16  
17  
18  
19  
20  
21  
22  
23  
24  
25  
26  
27  
28  
29  
30  
31  
32  
33  
34  
35  
36  
37  
38  
39  
40  
41  
42  
43  
44  
45  
46  
47  
48  
49  
50  
51  
52  
53  
54  
55  
56  
57  
58  
59  
60

**Ethics and dissemination:** No ethical approval is required for this study as it is based on already published data. The findings of the review will be published in a peer-reviewed journal and presented at conferences.

For peer review only

## References

1. Welcome to CDC stacks | Worldwide prevalence of anaemia 1993-2005; WHO Global Database of anaemia - 5351 | Stephen B. Thacker CDC Library collection. <https://stacks.cdc.gov/view/cdc/5351>. Accessed 17 Apr 2019.
2. Mbanya D, Tayou Tagny C, Mboka C, Tetanye E. Clinical indices of severe anaemia requiring transfusion in young children aged 0 – 5 years: Guidelines for resource-limited settings. *Afr Sang*. 2008;2:1–4.
3. Scott SP, Chen-Edinboro LP, Caulfield LE, Murray-Kolb LE. The Impact of Anemia on Child Mortality: An Updated Review. *Nutrients*. 2014;6:5915–32.
4. Lozoff B, Beard J, Connor J, Felt B, Georgieff M, Schallert T. Long-Lasting Neural and Behavioral Effects of Iron Deficiency in Infancy. *Nutr Rev*. 2006;64 5 Pt 2:S34–91.
5. Santos JN, Rates SPM, Lemos SMA, Lamounier JA. Consequences of anemia on language development of children from a public day care center. *Rev Paul Pediatr*. 2009;27:67–73.
6. World Health Organization. Haemoglobin concentrations for the diagnosis of anaemia and assessment of severity. <https://apps.who.int/iris/handle/10665/85839>.
7. Kassebaum NJ, Jasrasaria R, Naghavi M, Wulf SK, Johns N, Lozano R, et al. A systematic analysis of global anemia burden from 1990 to 2010. *Blood*. 2014;123:615–24.
8. Prevalence of anemia among children (% of children under 5) | Data. <https://data.worldbank.org/indicator/SH.ANM.CHLD.ZS>. Accessed 5 Sep 2019.
9. Muoneke VU, ChidiIbekwe R. Prevalence and Aetiology of Severe Anaemia in Under-5 Children in Abakaliki South Eastern Nigeria. 2011.
10. Ewusie JE, Ahiadeke C, Beyene J, Hamid JS. Prevalence of anemia among under-5 children in the Ghanaian population: estimates from the Ghana demographic and health survey. *BMC Public Health*. 2014;14:626.
11. Brabin BJ, Premji Z, Verhoeff F. An Analysis of Anemia and Child Mortality. *J Nutr*. 2001;131:636S–648S.
12. Mbanya D, Tagny CT, Akamba A, Mekongo MO, Tetanye E. [Causes of anaemia in African children aged 5 to 10 years]. *Sante Montrouge Fr*. 2008;18:227–30.
13. WHO | Sustainable Development Goal 3: Health. WHO. <http://www.who.int/topics/sustainable-development-goals/targets/en/>. Accessed 3 May 2019.
14. Ouzzani M, Hammady H, Fedorowicz Z, Elmagarmid A. Rayyan—a web and mobile app for systematic reviews. *Syst Rev*. 2016;5:210.
15. Hoy D, Brooks P, Woolf A, Blyth F, March L, Bain C, et al. Assessing risk of bias in prevalence studies: modification of an existing tool and evidence of interrater agreement. *J Clin Epidemiol*. 2012;65:934–9.

- 1  
2  
3 16. Wells G, Shea B, O'Connell D, Peterson J, Losos M, Tugwell P. The Newcastle-Ottawa Scale  
4 (NOS) for assessing the quality of nonrandomised studies in meta-analyses. 2011.  
5 [http://www.ohri.ca/programs/clinical\\_epidemiology/oxford.asp](http://www.ohri.ca/programs/clinical_epidemiology/oxford.asp). Accessed 8 Sep 2019.  
6  
7  
8 17. McHugh ML. Interrater reliability: the kappa statistic. *Biochem Medica Biochem Medica*.  
9 2012;22:276–82.  
10  
11 18. Miller JJ. The Inverse of the Freeman – Tukey Double Arcsine Transformation. *Am Stat*.  
12 1978;32:138–138.  
13  
14 19. Cochran WG. The Combination of Estimates from Different Experiments. *Biometrics*.  
15 1954;10:101–29.  
16  
17 20. Egger M, Smith GD, Schneider M, Minder C. Bias in meta-analysis detected by a simple,  
18 graphical test. *BMJ*. 1997;315:629–34.  
19  
20 21. Liberati A, Altman DG, Tetzlaff J, Mulrow C, Gøtzsche PC, Ioannidis JPA, et al. The PRISMA  
21 Statement for Reporting Systematic Reviews and Meta-Analyses of Studies That Evaluate Health  
22 Care Interventions: Explanation and Elaboration. *PLOS Med*. 2009;6:e1000100.  
23  
24  
25  
26  
27

## 28 **List of tables**

29  
30 Table 1: Search Strategy for PubMed

31  
32 Supplementary Table 1: Risk of bias assessment checklist for prevalence studies (adapted from Hoy  
33 et al)  
34

35  
36 Supplementary Table 2: Newcastle - Ottawa quality assessment scale case-control studies  
37

38  
39  
40 Supplementary Table 3: Newcastle - Ottawa quality assessment scale case-control studies  
41  
42  
43  
44  
45  
46  
47  
48  
49  
50  
51  
52  
53  
54  
55  
56  
57  
58  
59  
60

Table 1: Search Strategy for PubMed

| SN | Search Items                                                                                                                                                                                                                                                                                                                                                                                                                                                                                                                                                                                                                                                                                                                                                                                                                                                                                                                                                                                                                                                                                                                                                                                                                                                                                                                                                                                                                                                                                                                                                                                                                                                                                                                                                                                                                                                                                                                                                                                                     | Hits |
|----|------------------------------------------------------------------------------------------------------------------------------------------------------------------------------------------------------------------------------------------------------------------------------------------------------------------------------------------------------------------------------------------------------------------------------------------------------------------------------------------------------------------------------------------------------------------------------------------------------------------------------------------------------------------------------------------------------------------------------------------------------------------------------------------------------------------------------------------------------------------------------------------------------------------------------------------------------------------------------------------------------------------------------------------------------------------------------------------------------------------------------------------------------------------------------------------------------------------------------------------------------------------------------------------------------------------------------------------------------------------------------------------------------------------------------------------------------------------------------------------------------------------------------------------------------------------------------------------------------------------------------------------------------------------------------------------------------------------------------------------------------------------------------------------------------------------------------------------------------------------------------------------------------------------------------------------------------------------------------------------------------------------|------|
| 1. | (((Africa* [tiab] OR Algeria [tiab] OR Angola [tiab] OR Benin [tiab] OR Botswana [tiab] OR "Burkina Faso" [tiab] OR Burundi [tiab] OR Cameroon [tiab] OR "Canary Islands" [tiab] OR "Cape Verde" [tiab] OR "Central African Republic" [tiab] OR Chad [tiab] OR Comoros [tiab] OR Congo [tiab] OR "Democratic Republic of Congo" [tiab] OR Djibouti [tiab] OR Egypt [tiab] OR "Equatorial Guinea" [tiab] OR Eritrea [tiab] OR Ethiopia [tiab] OR Gabon [tiab] OR Gambia [tiab] OR Ghana [tiab] OR Guinea [tiab] OR "Guinea Bissau" [tiab] OR "Ivory Coast" [tiab] OR "Cote d'Ivoire" [tiab] OR Jamahiriya [tiab] OR Kenya [tiab] OR Lesotho [tiab] OR Liberia [tiab] OR Libya [tiab] OR Madagascar [tiab] OR Malawi [tiab] OR Mali [tiab] OR Mauritania [tiab] OR Mauritius [tiab] OR Mayotte [tiab] OR Morocco [tiab] OR Mozambique [tiab] OR Namibia [tiab] OR Niger [tiab] OR Nigeria [tiab] OR Principe [tiab] OR Reunion [tiab] OR Rwanda [tiab] OR "Sao Tome" [tiab] OR Senegal [tiab] OR Seychelles [tiab] OR "Sierra Leone" [tiab] OR Somalia [tiab] OR "South Africa" [tiab] OR "South Sudan" [tiab] OR "St Helena" [tiab] OR Sudan [tiab] OR Swaziland [tiab] OR Tanzania [tiab] OR Togo [tiab] OR Tunisia [tiab] OR Uganda [tiab] OR "Western Sahara" [tiab] OR Zaire [tiab] OR Zambia [tiab] OR Zimbabwe [tiab] OR "Central Africa" [tiab] OR "Central African" [tiab] OR "West Africa" [tiab] OR "West African" [tiab] OR "Western Africa" [tiab] OR "Western African" [tiab] OR "East Africa" [tiab] OR "East African" [tiab] OR "Eastern Africa" [tiab] OR "Eastern African" [tiab] OR "North Africa" [tiab] OR "North African" [tiab] OR "Northern Africa" [tiab] OR "Northern African" [tiab] OR "South African" [tiab] OR "Southern Africa" [tiab] OR "Southern African" [tiab] OR "sub Saharan Africa" [tiab] OR "sub Saharan African" [tiab] OR "subSaharan Africa" [tiab] OR "subSaharan African" [tiab]) NOT ("guinea pig" [tiab] OR "guinea pigs" [tiab] OR "aspergillus niger [tiab]")))) |      |
| 2. | 'anemia' OR 'anaemia' OR 'anemias' OR 'anaemias' OR 'hemoglobin' OR 'haemoglobin'                                                                                                                                                                                                                                                                                                                                                                                                                                                                                                                                                                                                                                                                                                                                                                                                                                                                                                                                                                                                                                                                                                                                                                                                                                                                                                                                                                                                                                                                                                                                                                                                                                                                                                                                                                                                                                                                                                                                |      |
| 3. | #1 AND #2                                                                                                                                                                                                                                                                                                                                                                                                                                                                                                                                                                                                                                                                                                                                                                                                                                                                                                                                                                                                                                                                                                                                                                                                                                                                                                                                                                                                                                                                                                                                                                                                                                                                                                                                                                                                                                                                                                                                                                                                        |      |
| 4. | (("Child, Preschool"[Mesh]) AND "Infant"[Mesh])                                                                                                                                                                                                                                                                                                                                                                                                                                                                                                                                                                                                                                                                                                                                                                                                                                                                                                                                                                                                                                                                                                                                                                                                                                                                                                                                                                                                                                                                                                                                                                                                                                                                                                                                                                                                                                                                                                                                                                  |      |
| 5. | #3 AND #4                                                                                                                                                                                                                                                                                                                                                                                                                                                                                                                                                                                                                                                                                                                                                                                                                                                                                                                                                                                                                                                                                                                                                                                                                                                                                                                                                                                                                                                                                                                                                                                                                                                                                                                                                                                                                                                                                                                                                                                                        |      |
| 6. | Publication date limits: from database inception to 30 September 2019, with no language restrictions                                                                                                                                                                                                                                                                                                                                                                                                                                                                                                                                                                                                                                                                                                                                                                                                                                                                                                                                                                                                                                                                                                                                                                                                                                                                                                                                                                                                                                                                                                                                                                                                                                                                                                                                                                                                                                                                                                             |      |

## Supplementary Table 1: Risk of bias assessment checklist for prevalence studies (adapted from Hoy et al)

| Name of author(s):                                                                                                                                            |                                                                                                                                                                                                                                                |               |
|---------------------------------------------------------------------------------------------------------------------------------------------------------------|------------------------------------------------------------------------------------------------------------------------------------------------------------------------------------------------------------------------------------------------|---------------|
| Year of publication:                                                                                                                                          |                                                                                                                                                                                                                                                |               |
| Study title:                                                                                                                                                  |                                                                                                                                                                                                                                                |               |
| Risk of bias items                                                                                                                                            | Risk of bias levels                                                                                                                                                                                                                            | Points scored |
| 1. Was the study's target population a close representation of the national population in relation to relevant variables, e.g. age, sex, occupation?          | <b>Yes (LOW RISK):</b> The study's target population was a close representation of the national population.                                                                                                                                    | 0             |
|                                                                                                                                                               | <b>No (HIGH RISK):</b> The study's target population was clearly NOT representative of the national population.                                                                                                                                | 1             |
| 2. Was the sampling frame a true or close representation of the target population?                                                                            | <b>Yes (LOW RISK):</b> The sampling frame was a true or close representation of the target population.                                                                                                                                         | 0             |
|                                                                                                                                                               | <b>No (HIGH RISK):</b> The sampling frame was NOT a true or close representation of the target population.                                                                                                                                     | 1             |
| 3. Was some form of random selection used to select the sample, OR, was a census undertaken?                                                                  | <b>Yes (LOW RISK):</b> A census was undertaken, OR, some form of random selection was used to select the sample (e.g. simple random sampling, stratified random sampling, cluster sampling, systematic sampling).                              | 0             |
|                                                                                                                                                               | <b>No (HIGH RISK):</b> A census was NOT undertaken, AND some form of random selection was NOT used to select the sample.                                                                                                                       | 1             |
| 4. Was the likelihood of non-response bias minimal?                                                                                                           | <b>Yes (LOW RISK):</b> The response rate for the study was $\geq 75\%$ , OR, an analysis was performed that showed no significant difference in relevant demographic characteristics between responders and non- responders                    | 0             |
|                                                                                                                                                               | <b>No (HIGH RISK):</b> The response rate was $< 75\%$ , and if any analysis comparing responders and non-responders was done, it showed a significant difference in relevant demographic characteristics between responders and non-responders | 1             |
| 5. Were data collected directly from the subjects (as opposed to a proxy)?                                                                                    | <b>Yes (LOW RISK):</b> All data were collected directly from the subjects.                                                                                                                                                                     | 0             |
|                                                                                                                                                               | <b>No (HIGH RISK):</b> In some instances, data were collected from a proxy.                                                                                                                                                                    | 1             |
| 6. Was an acceptable case definition used in the study?                                                                                                       | <b>Yes (LOW RISK):</b> An acceptable case definition was used.                                                                                                                                                                                 | 0             |
|                                                                                                                                                               | <b>No (HIGH RISK):</b> An acceptable case definition was NOT used                                                                                                                                                                              | 1             |
| 7. Was the study instrument that measured the parameter of interest (e.g. prevalence of low back pain) shown to have reliability and validity (if necessary)? | <b>Yes (LOW RISK):</b> The study instrument had been shown to have reliability and validity (if this was necessary), e.g. test-re- test, piloting, validation in a previous study, etc.                                                        | 0             |
|                                                                                                                                                               | <b>No (HIGH RISK):</b> The study instrument had NOT been shown to have reliability or validity (if this was necessary).                                                                                                                        | 1             |
| 8. Was the same mode of data collection used for all subjects?                                                                                                | <b>Yes (LOW RISK):</b> The same mode of data collection was used for all subjects.                                                                                                                                                             | 0             |
|                                                                                                                                                               | <b>No (HIGH RISK):</b> The same mode of data collection was NOT used for all subjects.                                                                                                                                                         | 1             |
| 9. Was the length of the shortest prevalence period for the parameter of interest appropriate?                                                                | <b>Yes (LOW RISK):</b> The length of the shortest prevalence period for the parameter of interest was appropriate.                                                                                                                             | 0             |
|                                                                                                                                                               | <b>No (HIGH RISK):</b> the length of the shortest prevalence period for the parameter of interest was NOT appropriate.                                                                                                                         | 1             |
| 10. Were the numerator(s) and denominator(s) for the parameter of interest appropriate                                                                        | <b>Yes (LOW RISK):</b> The paper presented appropriate numerator(s) AND denominator(s) for the parameter of interest (e.g. the prevalence of low back pain).                                                                                   | 0             |
|                                                                                                                                                               | <b>No (HIGH RISK):</b> The paper did present numerator(s) AND denominator(s) for the parameter of interest but one or more of these were inappropriate.                                                                                        | 1             |
| <b>Summary on the overall risk of study bias</b>                                                                                                              | <b>LOW RISK</b>                                                                                                                                                                                                                                | 0-4           |
|                                                                                                                                                               | <b>MODERATE RISK</b>                                                                                                                                                                                                                           | 5-7           |
|                                                                                                                                                               | <b>HIGH RISK</b>                                                                                                                                                                                                                               | 8-10          |



**Supplementary Table 2. NEWCASTLE - OTTAWA QUALITY ASSESSMENT SCALE  
CASE CONTROL STUDIES**

Note: A study can be awarded a maximum of one star for each numbered item within the Selection and Exposure categories. A maximum of two stars can be given for Comparability.

| No                   | Criterion                                                                  | Decision rule                                                                                                                                                                                               | Score (* = 1, No* = 0) |
|----------------------|----------------------------------------------------------------------------|-------------------------------------------------------------------------------------------------------------------------------------------------------------------------------------------------------------|------------------------|
| <b>Selection</b>     |                                                                            |                                                                                                                                                                                                             |                        |
| 1.                   | Is the case definition adequate?                                           | a) yes, with independent validation *<br>b) yes, eg record linkage or based on self reports<br>c) no description                                                                                            |                        |
| 2.                   | Representativeness of the cases                                            | a) consecutive or obviously representative series of cases *<br>b) potential for selection biases or not stated                                                                                             |                        |
| 3.                   | Selection of Controls                                                      | a) community controls *<br>b) hospital controls<br>c) no description                                                                                                                                        |                        |
| 4.                   | Definition of Controls                                                     | a) no history of disease (endpoint) *<br>b) no description of source                                                                                                                                        |                        |
| <b>Comparability</b> |                                                                            |                                                                                                                                                                                                             |                        |
| 1.                   | Comparability of cases and controls on the basis of the design or analysis | a) study controls for age *<br>b) study controls for gender *                                                                                                                                               |                        |
| <b>Exposure</b>      |                                                                            |                                                                                                                                                                                                             |                        |
| 1.                   | Ascertainment of exposure                                                  | a) secure record *<br>b) structured interview where blind to case/control status *<br>c) interview not blinded to case/control status<br>d) written self report or medical record only<br>e) no description |                        |
| 2.                   | Same method of ascertainment for cases and controls                        | a) Yes *<br>b) No                                                                                                                                                                                           |                        |
| 3.                   | Non-Response rate                                                          | a) same rate for both groups *<br>b) non respondents described<br>c) rate different and no designation                                                                                                      |                        |
| Score                |                                                                            |                                                                                                                                                                                                             |                        |

### Supplementary Table 3. NEWCASTLE - OTTAWA QUALITY ASSESSMENT SCALE COHORT STUDIES

**Note:** A study can be awarded a maximum of one star for each numbered item within the Selection and Outcome categories. A maximum of two stars can be given for Comparability

| No                   | Criterion                                                                | Decision rule                                                                                                                                                                                                                                                                  | Score (* = 1, No* = 0) |
|----------------------|--------------------------------------------------------------------------|--------------------------------------------------------------------------------------------------------------------------------------------------------------------------------------------------------------------------------------------------------------------------------|------------------------|
| <b>Selection</b>     |                                                                          |                                                                                                                                                                                                                                                                                |                        |
| 1.                   | Representativeness of the exposed cohort                                 | a) Consecutive eligible participants were selected, participants were randomly selected, or all participants were invited to participate from the source population*<br>b) Not satisfying requirements in part (a), or not stated.                                             |                        |
| 2.                   | Selection of the non-exposed cohort                                      | a) Selected from the same source population*<br>b) Selected from a different source population<br>c) No description                                                                                                                                                            |                        |
| 3.                   | Ascertainment of exposure                                                | a) secure record (eg surgical records) *<br>b) structured interview *<br>c) written self report<br>d) no description                                                                                                                                                           |                        |
| 4.                   | Demonstration that outcome of interest was not present at start of study | a) Yes *<br>b) No                                                                                                                                                                                                                                                              |                        |
| <b>Comparability</b> |                                                                          |                                                                                                                                                                                                                                                                                |                        |
| 1.                   | Comparability of cohorts on the basis of the design or analysis          | a) study controls for age*<br>b) study controls for gender *                                                                                                                                                                                                                   |                        |
| <b>Outcome</b>       |                                                                          |                                                                                                                                                                                                                                                                                |                        |
| 1.                   | Assessment of outcome                                                    | a) independent blind assessment *<br>b) record linkage *<br>c) self report<br>d) no description                                                                                                                                                                                |                        |
| 2.                   | Was follow-up long enough for outcomes to occur                          | a) Yes *<br>b) No                                                                                                                                                                                                                                                              |                        |
| 3.                   | Adequacy of follow up of cohorts                                         | a) complete follow up - all subjects accounted for *<br>b) subjects lost to follow up unlikely to introduce bias - small number lost (< 15% follow up, or description provided of those lost) *<br>c) follow up rate < 85% and no description of those lost<br>d) no statement |                        |
| Score                |                                                                          |                                                                                                                                                                                                                                                                                |                        |

**PRISMA-P (Preferred Reporting Items for Systematic review and Meta-Analysis Protocols) 2015 checklist: recommended items to address in a systematic review protocol**

| Section and topic                 | Item No | Checklist item                                                                                                                                                                                                                | Page #     |
|-----------------------------------|---------|-------------------------------------------------------------------------------------------------------------------------------------------------------------------------------------------------------------------------------|------------|
| <b>ADMINISTRATIVE INFORMATION</b> |         |                                                                                                                                                                                                                               |            |
| Title:                            |         |                                                                                                                                                                                                                               |            |
| Identification                    | 1a      | Identify the report as a protocol of a systematic review                                                                                                                                                                      | 1          |
| Update                            | 1b      | If the protocol is for an update of a previous systematic review, identify as such                                                                                                                                            | NA         |
| Registration                      | 2       | If registered, provide the name of the registry (such as PROSPERO) and registration number                                                                                                                                    | 3          |
| Authors:                          |         |                                                                                                                                                                                                                               |            |
| Contact                           | 3a      | Provide name, institutional affiliation, e-mail address of all protocol authors; provide physical mailing address of corresponding author                                                                                     | 1          |
| Contributions                     | 3b      | Describe contributions of protocol authors and identify the guarantor of the review                                                                                                                                           | 13         |
| Amendments                        | 4       | If the protocol represents an amendment of a previously completed or published protocol, identify as such and list changes; otherwise, state plan for documenting important protocol amendments                               | 11         |
| Support:                          |         |                                                                                                                                                                                                                               |            |
| Sources                           | 5a      | Indicate sources of financial or other support for the review                                                                                                                                                                 | 13         |
| Sponsor                           | 5b      | Provide name for the review funder and/or sponsor                                                                                                                                                                             | NA         |
| Role of sponsor or funder         | 5c      | Describe roles of funder(s), sponsor(s), and/or institution(s), if any, in developing the protocol                                                                                                                            | NA         |
| <b>INTRODUCTION</b>               |         |                                                                                                                                                                                                                               |            |
| Rationale                         | 6       | Describe the rationale for the review in the context of what is already known                                                                                                                                                 | 4          |
| Objectives                        | 7       | Provide an explicit statement of the question(s) the review will address with reference to participants, interventions, comparators, and outcomes (PICO)                                                                      | 5          |
| <b>METHODS</b>                    |         |                                                                                                                                                                                                                               |            |
| Eligibility criteria              | 8       | Specify the study characteristics (such as PICO, study design, setting, time frame) and report characteristics (such as years considered, language, publication status) to be used as criteria for eligibility for the review | 5-6        |
| Information sources               | 9       | Describe all intended information sources (such as electronic databases, contact with study authors, trial registers or other grey literature sources) with planned dates of coverage                                         | 6-7        |
| Search strategy                   | 10      | Present draft of search strategy to be used for at least one electronic database, including planned limits, such that it could be repeated                                                                                    | 6, Table 1 |
| Study records:                    |         |                                                                                                                                                                                                                               |            |
| Data                              | 11a     | Describe the mechanism(s) that will be used to manage records and data throughout the review                                                                                                                                  | 7          |

|                                    |     |                                                                                                                                                                                                                                                  |      |
|------------------------------------|-----|--------------------------------------------------------------------------------------------------------------------------------------------------------------------------------------------------------------------------------------------------|------|
| management                         |     |                                                                                                                                                                                                                                                  |      |
| Selection process                  | 11b | State the process that will be used for selecting studies (such as two independent reviewers) through each phase of the review (that is, screening, eligibility and inclusion in meta-analysis)                                                  | 7    |
| Data collection process            | 11c | Describe planned method of extracting data from reports (such as piloting forms, done independently, in duplicate), any processes for obtaining and confirming data from investigators                                                           | 8    |
| Data items                         | 12  | List and define all variables for which data will be sought (such as PICO items, funding sources), any pre-planned data assumptions and simplifications                                                                                          | 8    |
| Outcomes and prioritization        | 13  | List and define all outcomes for which data will be sought, including prioritization of main and additional outcomes, with rationale                                                                                                             | 8    |
| Risk of bias in individual studies | 14  | Describe anticipated methods for assessing risk of bias of individual studies, including whether this will be done at the outcome or study level, or both; state how this information will be used in data synthesis                             | 9    |
| Data synthesis                     | 15a | Describe criteria under which study data will be quantitatively synthesised                                                                                                                                                                      | 9-10 |
|                                    | 15b | If data are appropriate for quantitative synthesis, describe planned summary measures, methods of handling data and methods of combining data from studies, including any planned exploration of consistency (such as $I^2$ , Kendall's $\tau$ ) | 9-10 |
|                                    | 15c | Describe any proposed additional analyses (such as sensitivity or subgroup analyses, meta-regression)                                                                                                                                            | 10   |
|                                    | 15d | If quantitative synthesis is not appropriate, describe the type of summary planned                                                                                                                                                               | 10   |
| Meta-bias(es)                      | 16  | Specify any planned assessment of meta-bias(es) (such as publication bias across studies, selective reporting within studies)                                                                                                                    | 9    |
| Confidence in cumulative evidence  | 17  | Describe how the strength of the body of evidence will be assessed (such as GRADE)                                                                                                                                                               | NA   |

# BMJ Open

## Prevalence and determinants of anaemia in children aged 6 to 59 months in Africa: a protocol for systematic review and meta-analysis

|                                 |                                                                                                                                                                                                                                                                                                                                                                                                                                                                                                                                                                                                                                                                                                                                                                                                                                                                                         |
|---------------------------------|-----------------------------------------------------------------------------------------------------------------------------------------------------------------------------------------------------------------------------------------------------------------------------------------------------------------------------------------------------------------------------------------------------------------------------------------------------------------------------------------------------------------------------------------------------------------------------------------------------------------------------------------------------------------------------------------------------------------------------------------------------------------------------------------------------------------------------------------------------------------------------------------|
| Journal:                        | <i>BMJ Open</i>                                                                                                                                                                                                                                                                                                                                                                                                                                                                                                                                                                                                                                                                                                                                                                                                                                                                         |
| Manuscript ID                   | bmjopen-2019-032042.R3                                                                                                                                                                                                                                                                                                                                                                                                                                                                                                                                                                                                                                                                                                                                                                                                                                                                  |
| Article Type:                   | Protocol                                                                                                                                                                                                                                                                                                                                                                                                                                                                                                                                                                                                                                                                                                                                                                                                                                                                                |
| Date Submitted by the Author:   | 19-Dec-2019                                                                                                                                                                                                                                                                                                                                                                                                                                                                                                                                                                                                                                                                                                                                                                                                                                                                             |
| Complete List of Authors:       | Simo, Larissa Pone ; Faculty of Health Sciences, University of Bamenda, Bamenda, Cameroon<br>Agbor, Ndip; Ibal sub-Divisional Hospital, General practice<br>AgborNdip, Ettamba; Health Education and Research Organization (HERO), Department of Clinical Research<br>Ekaney, Domin Sone ; Health Education and Research Organization (HERO), Department of Clinical Research<br>Mbeng , Emmanuel ; Health Education and Research Organization (HERO), Department of Clinical Research<br>Linonge, Christie ; Health Education and Research Organization (HERO), Department of Clinical Research<br>Neba , Kilton ; Health Education and Research Organization (HERO), Department of Clinical Research<br>Kemah, Ben-Lawrence ; Health Education and Research Organization (HERO), Department of Clinical Research<br>Mbanya , Dora ; University of Bamenda, Faculty of Health Sciences |
| <b>Primary Subject Heading</b>: | Epidemiology                                                                                                                                                                                                                                                                                                                                                                                                                                                                                                                                                                                                                                                                                                                                                                                                                                                                            |
| Secondary Subject Heading:      | Paediatrics, Global health                                                                                                                                                                                                                                                                                                                                                                                                                                                                                                                                                                                                                                                                                                                                                                                                                                                              |
| Keywords:                       | Anaemia < HAEMATOLOGY, Child, Infant, Africa                                                                                                                                                                                                                                                                                                                                                                                                                                                                                                                                                                                                                                                                                                                                                                                                                                            |
|                                 |                                                                                                                                                                                                                                                                                                                                                                                                                                                                                                                                                                                                                                                                                                                                                                                                                                                                                         |

SCHOLARONE™  
Manuscripts



I, the Submitting Author has the right to grant and does grant on behalf of all authors of the Work (as defined in the below author licence), an exclusive licence and/or a non-exclusive licence for contributions from authors who are: i) UK Crown employees; ii) where BMJ has agreed a CC-BY licence shall apply, and/or iii) in accordance with the terms applicable for US Federal Government officers or employees acting as part of their official duties; on a worldwide, perpetual, irrevocable, royalty-free basis to BMJ Publishing Group Ltd ("BMJ") its licensees and where the relevant Journal is co-owned by BMJ to the co-owners of the Journal, to publish the Work in this journal and any other BMJ products and to exploit all rights, as set out in our [licence](#).

The Submitting Author accepts and understands that any supply made under these terms is made by BMJ to the Submitting Author unless you are acting as an employee on behalf of your employer or a postgraduate student of an affiliated institution which is paying any applicable article publishing charge ("APC") for Open Access articles. Where the Submitting Author wishes to make the Work available on an Open Access basis (and intends to pay the relevant APC), the terms of reuse of such Open Access shall be governed by a Creative Commons licence – details of these licences and which [Creative Commons](#) licence will apply to this Work are set out in our licence referred to above.

Other than as permitted in any relevant BMJ Author's Self Archiving Policies, I confirm this Work has not been accepted for publication elsewhere, is not being considered for publication elsewhere and does not duplicate material already published. I confirm all authors consent to publication of this Work and authorise the granting of this licence.

## Prevalence and determinants of anaemia in children aged 6 to 59 months in Africa: a protocol for systematic review and meta-analysis

**Authors:** Larissa Simo Pone <sup>1,2</sup>; Valirie Ndip Agbor <sup>3,4\*</sup>; Ettamba AgborNdip <sup>4,5</sup>; Domin Sone M. Ekaney <sup>2,4,6</sup>; Emmanuel Njang Mbeng <sup>4</sup>; Christie Etom Linonge <sup>2,4</sup>; Kilton Nforchu Neba <sup>4,6</sup>; Ben-Lawrence Ayong Kemah <sup>4</sup>; Dora Mbanya <sup>1,7</sup>

### Affiliations:

- 1: Faculty of Health Sciences, the University of Bamenda, Cameroon
- 2: Clinical Research Education, Networking & Consultancy (CRENC), Douala, Cameroon
- 3: Nuffield Department of Population Health, University of Oxford, Oxford, United Kingdom
- 4: Department of Clinical Research, Health Education and Research Organization (HERO), Cameroon
- 5: Institute of Child Health, University College London, London, United Kingdom.
- 6: Ecole de Santé Publique, Université Libre de Bruxelles, Bruxelles, Belgium
- 7: Yaoundé University Teaching Hospital (YUTH), Yaoundé, Cameroon.

**Email addresses:** LPS: [ponelarissa@gmail.com](mailto:ponelarissa@gmail.com); VNA: [nvagbor@gmail.com](mailto:nvagbor@gmail.com); EA: [ettamba.agborndip@herocameroon.org](mailto:ettamba.agborndip@herocameroon.org); DSME: [domin.ekaney@herocameroon.org](mailto:domin.ekaney@herocameroon.org); ENM: [njangjr@gmail.com](mailto:njangjr@gmail.com); CEL: [christie.linonge@herocameroon.org](mailto:christie.linonge@herocameroon.org); KNN: [nforchuneba@yahoo.com](mailto:nforchuneba@yahoo.com); BAK: [kbenlawrence@gmail.com](mailto:kbenlawrence@gmail.com); DM: [dmbanya1@yahoo.co.uk](mailto:dmbanya1@yahoo.co.uk)

**\*Corresponding author:** Valirie Ndip Agbor, MD, Email: [nvagbor@gmail.com](mailto:nvagbor@gmail.com). Tel. 00 237 676546548

## Abstract

**Introduction:** Anaemia, especially in children less than five years old, is a global health problem disproportionately affecting populations in low- and middle-income countries. It is associated with high disability and death rates and has a negative effect on development. This study seeks to evaluate the prevalence and determinants of anaemia in children aged 6-59 months residing in Africa.

**Methods and analysis:** This protocol was prepared using the 2015 Preferred Reporting Items for Systematic Reviews and Meta-analyses for Protocols (PRISMA-P) guidelines. Relevant citations will be identified by searching EMBASE, Web of Science, PubMed, Global Medicus Index, and African Journals Online from inception to 30 September 2019 with no language restrictions. Two authors will independently screen and select eligible studies for the review. Random effect meta-analytic methods will be used to pool study-specific estimates and heterogeneity will be assessed and quantified using the  $\chi^2$  test on Cochrane's Q and  $I^2$  statistics, respectively. Publication bias will be evaluated using funnel plots and Egger's test. Subgroup analysis and multiple meta-regression using backward elimination will be performed to account for substantial heterogeneity.

**Ethics and dissemination:** No ethical approval is required for this study as it is based on already published data. The findings of the review will be published in a peer-reviewed journal and presented at conferences.

**Keywords:** Anaemia, child, infant, Africa.

**Word count:** Abstract = 234; main text = 1460

Number of tables =1; Number of figures =0; supplementary files =2

### Strengths and limitations of the study

1. This will be the first systematic review and meta-analysis to estimate the burden of anaemia in children aged 6-59 months living on the African continent.
2. We anticipate substantial heterogeneity in the prevalence of anaemia among published studies in Africa.
3. Nevertheless, appropriate systematic review and robust meta-analytic methods will be used to conduct the review and account for heterogeneity across studies, if any.



## Introduction

Anaemia is a global public health problem associated with high morbidity and mortality rates, increased hospitalisation and a reverse effect on socioeconomic development [1–3]. Anaemia in infancy is associated with long-lasting effects on the brain and behaviour leading to poorer motor, cognitive and social-emotional functions [4, 5]. The World Health Organisation (WHO) currently defines anaemia in children aged 6-59 months as a haemoglobin concentration less than 110g/l [6]. The aetiologies of anaemia could be multifactorial and vary globally depending on geography, age and gender [7]. Nonetheless, Iron Deficiency Anaemia (IDA) is known to be the most important contributing factor to the global burden of the disease [6]. Other aetiologies of anaemia include other nutritional deficiencies (folate, B6, B12), haemoglobinopathies, parasitic infections, as well as acute and chronic inflammation [1, 6]. In a systematic analysis from 1990 to 2010, Kassebaum *et al* reported a rising prevalence of anaemia from malaria, schistosomiasis and chronic kidney disease [7].

In 2010, the global prevalence of anaemia was estimated at 32.9% with the regions of South East Asia, Central, West and East sub-Saharan Africa bearing the greatest burden [7]. Though occurring at different stages in the life, pregnant women and preschool age children have been found to be at greatest risk of developing anaemia [1], with children aged less than five years found to be the only age group with a negative trend from 1990 to 2010 [7]. The WHO estimates of 2011 suggested that about 273 million children and 42 million pregnant women had anaemia worldwide [6]. According to data from the World Bank, the global prevalence of anaemia in children below five years reduced steadily from 41.5% in 1990 and then remained steady around 41.5% between 2013 and 2016 [8].

The prevalence of anaemia in children under five years in Africa varies from 9.7% in South eastern Nigeria to 78.4% in Ghana [9, 10]. Existing evidence suggests that severe anaemia, accounting for most anaemia-related deaths, mostly occurs among children under-five, and generally in the rainy season (in the tropics) when the incidence of malaria is at its peak [9]. Furthermore, mortality from malaria-associated severe anaemia is greater than that from iron deficiency anaemia in sub-Saharan Africa [11]. Besides malaria endemicity, poor nutrition, sickle cell disease, late arrival at health facilities, ignorance and poverty also account for high prevalence rates of anaemia in this region [9, 12].

The dearth of current estimates on the prevalence of anaemia in children under five residing in Africa, prompted the need for this study to assess the burden of anaemia among this age group and inform policies aimed at achieving the sustainable development goal 3.2 which has as aim to “end preventable deaths of newborns and children under 5 years of age by 2030” [13]. The aim of this systematic review

1  
2  
3 is to summarise the prevalence and determinants of anaemia in children aged 6-59 months residing in  
4 Africa.  
5

## 6 7 **Methods**

### 8 9 **Criteria for selection of studies for the review**

#### 10 11 **Inclusion criteria**

- 12  
13 1. Cross-sectional, control arm of randomised controlled trials, case-control and cohort studies  
14  
15 published up to 30 September 2019 with available data to on the prevalence and determinants  
16  
17 of anaemia in children between 6-59 months residing in Africa will be considered  
18  
19
- 20  
21 2. For studies which assessed the determinants of anaemia, only those where adjustment for at  
22  
23 least one exposure variable was done will be eligible for inclusion in our study.
- 24  
25 3. Studies which diagnosed anaemia by measuring haemoglobin concentration using a complete  
26  
27 blood count or hemoglobinometer, and defined anaemia as haemoglobin levels below 11.0 g/dl  
28  
29 according to WHO and the United Nations Children Funds [6]
- 30  
31 4. Studies which defined either mild, moderate or severe anaemia as haemoglobin values of 10.0-  
32  
33 10.9, 7.0-9.9 or less than 7.0 g/dl, respectively [6]
- 34  
35 5. Age limit: children from 6 to 59 months of age
- 36  
37 6. For duplicate publications, only the most recent, comprehensive publication with the largest  
38  
39 sample will be included.

#### 40 41 **Exclusion criteria**

- 42  
43 1. Reviews, commentaries, letters, case reports and case series with less than 30 participants
- 44  
45 2. Studies conducted in a population with haemoglobinopathies like as sickle cell anaemia.
- 46  
47 3. Studies with no information on the tool used to diagnose anaemia.

#### 48 49 **Information sources**

##### 50 51 **Search strategy**

52 We will search for relevant titles and abstracts on anaemia in children aged 6-59 months published in  
53 EMBASE, Web of Science, PubMed, Global Medicus Index, and African Journals Online from  
54 inception to 30 September 2019. Medical subject headings and key text words like ‘anaemia’ OR  
55 ‘anaemia’ OR ‘haemoglobin’ will be combined to a list of the 54 African nations to optimise the  
56 sensitivity of our search, Table 1. The references of eligible full text and relevant reviews will also be  
57 screened for potential articles missed during our search. We will also search the World Hematology  
58  
59  
60

1  
2  
3 Congress, International Pediatrics Association Congress, International Conference on Pediatrics &  
4 Primary Care, and International Conference on Pediatrics Health conference proceedings.  
5 Furthermore, ResearchGate will be searched for conference abstracts and articles not cited in the  
6  
7  
8  
9  
10  
11  
12  
13  
14  
15  
16  
17  
18  
19  
20  
21  
22  
23  
24  
25  
26  
27  
28  
29  
30  
31  
32  
33  
34  
35  
36  
37  
38  
39  
40  
41  
42  
43  
44  
45  
46  
47  
48  
49  
50  
51  
52  
53  
54  
55  
56  
57  
58  
59  
60

Furthermore, ResearchGate will be searched for conference abstracts and articles not cited in the  
aforementioned databases.

## **Study records**

### **Data management and study screening**

The titles and abstracts of from database searches will be exported to EndNote X9 for removal of  
duplicates. The remaining titles and abstracts will then be exported to the application Rayyan QCRI  
[14] for screening of titles and abstracts. The full text of selected abstracts will be downloaded and  
assessed using the eligibility criteria for final inclusion. The full texts of citations identified through  
bibliographic screening will also be assessed for eligibility before final inclusion. The screening  
process will be independently conducted by two authors and any discrepancies will be resolved  
through discussion until a consensus is reached, otherwise a third author will be called upon for  
arbitration.

### **Data items and extraction**

A pre-structured Google Form will be used for data abstraction by two authors independently who will  
then crosscheck each other's constituted database for completeness and correctness. Data will be  
extracted on the surname of the first author and the year of publication, the country of study, the study  
area (urban, rural and suburbs), and study design (cross sectional, cohort). The region of Africa where  
the study was conducted will be deduced from the country where the study was conducted. We will  
also extract data on the study setting (hospital, school and community-based), sampling method  
(random sampling, consecutive, convenient), timing of data collection (prospective vs retrospective),  
test used to diagnose anaemia (complete blood count or haemoglobinometer), male proportion, mean  
or median age in months, and sample size. In addition, we will extract data on number of: participants  
with anaemia, males, males with anaemia, females, females with anaemia, participants with mild  
anaemia, males with mild anaemia, females with mild anaemia, participants with moderate, males with  
moderate anaemia, females with moderate anaemia, participants with severe anaemia, males with  
severe anaemia, and females with severe anaemia. Finally, data on potential measures of association  
(adjusted odds ratio and relative risk) of the determinants of anaemia will be extracted.

1  
2  
3 Where possible, data for multinational studies will be reported according to the country where the  
4 study was conducted. Else, they will be reported as a single study, and the countries where the study  
5 was conducted will be highlighted.  
6  
7

### 8 9 **Assessment of methodological quality and risk of bias**

10  
11 The two authors who performed data extraction will assess the quality of the included studies. Quality  
12 assessment of the included studies will be conducted simultaneously with the process of data  
13 abstraction. An adapted version of the Hoy *et al* [15] tool will be used to assess the risk of bias of  
14 prevalence studies, **Supplementary Table 1**. Risk of bias will be totalled on 10 and scores of 0 – 4, 5  
15 – 7 and 8 – 10 will represent low, moderate and high risk of bias, respectively. The Newcastle Ottawa  
16 Scale [16] will be used to assess the quality of case-control and cohort studies, **Supplementary Table**  
17 **2 and 3**.  
18  
19  
20  
21  
22

### 23 24 **Data synthesis and analysis**

25  
26 The ‘meta’ package of the statistical software R (version 3.5.3, The R Foundation for statistical  
27 computing, Vienna, Austria) will be used for data analysis. The Cohen  $k$  statistics will be used to  
28 evaluate inter-rater agreement between authors for study inclusion, data abstraction and assessment of  
29 study quality [17]. The numerators and denominators of variables of interest from each individual  
30 study will be used to calculate the study-specific prevalence estimates before pooling using random  
31 effect models. Before pooling, the Freeman-Tukey double arcsine transformation will be used to  
32 stabilise the variance of each study-specific estimate [18]. The  $\chi^2$  test on Cochrane’s  $Q$  statistics, and  
33  $I^2$  will be used to assess and quantify heterogeneity across studies, respectively [19].  $I^2$  values of 70%  
34 or over will be considered as evidence of substantial heterogeneity [20]. Prevalence estimates will be  
35 pooled according to the different Africa regions, and the Q-test of analysis of variance will be used to  
36 compare the pooled estimates. Publication bias will be assessed visually using funnel plots for  
37 asymmetry and confirmed statistically using the Egger’s test [20]. P values below 10% on Egger’s test  
38 will be considered statistically significant for publication bias.  
39  
40  
41  
42  
43  
44  
45  
46  
47  
48

49 In case of substantial heterogeneity across studies, a subgroup analysis will be conducted with the  
50 following variables: study region (North Africa [northern] vs sub-Saharan Africa [southern, western,  
51 central and eastern]), study setting (hospital-based, school-based and community-based), gender (Male  
52 vs Female) study area (rural, urban, suburb), and random sampling (Yes/No). A sensitivity analysis  
53 including only studies with low risk of bias will be performed to estimate the prevalence of anaemia.  
54  
55  
56  
57  
58  
59  
60

1  
2  
3 Multiple meta-regression analysis using backward elimination will be used to assess the impact of age,  
4 gender, publication year, study region (North Africa [northern] vs sub-Saharan Africa [southern,  
5 western, central and eastern]), study area (rural, urban, suburb), study sampling (random vs non-  
6 random), study setting (hospital, school and community-based), and year of publication on the overall  
7 summary proportion. Only variables with p values <0.25 on bivariate analysis will be included in the  
8 multiple regression model. Two-sided p-values less than 5% will be considered statistically significant.  
9

10  
11  
12 Data on the determinants of anaemia will be synthesized using narrative summaries and tables.  
13

### 14 15 16 **Patient and public involvement**

17  
18  
19 Patients and/or the public were not directly involved in this study.  
20  
21

### 22 23 **Presentation and reporting of results**

24  
25 The Preferred Reporting Items for Systematic Reviews and Meta-Analyses 2009 statement [21] will  
26 be used to publish this review. The process of study screening and selection will be reported with the  
27 aid of a flow diagram depicting the reason(s) of study exclusion. Prevalence measures will be displayed  
28 using forest plots and tables, while the determinants of anaemia and risk of bias assessment will be  
29 presented as narrative summaries and using tables.  
30  
31

### 32 33 **Protocol amendments**

34  
35  
36 The authors do not plan to modify this protocol. Nevertheless, subsequent revisions in the study review  
37 will be carefully reported.  
38  
39

40  
41 **Contributors:** Study conception: VNA; Designed the protocol: LPS, VNA; Drafted the protocol:  
42 LPS, VNA; Protocol revision: EA, DSME, ENM, CEL, KNN, BAK Critical revision: DM. VNA is  
43 the guarantor of this review.  
44  
45

46  
47  
48 **Competing interest:** None declared.  
49

50  
51  
52 **Funding:** This research received no specific grant from any funding agency in the public, commercial  
53 or not-for-profit sectors.  
54  
55

### 56 57 **Data sharing statement**

58  
59 No additional data are available  
60

1  
2  
3  
4  
5  
6  
7  
8  
9  
10  
11  
12  
13  
14  
15  
16  
17  
18  
19  
20  
21  
22  
23  
24  
25  
26  
27  
28  
29  
30  
31  
32  
33  
34  
35  
36  
37  
38  
39  
40  
41  
42  
43  
44  
45  
46  
47  
48  
49  
50  
51  
52  
53  
54  
55  
56  
57  
58  
59  
60

**Ethics and dissemination:** No ethical approval is required for this study as it is based on already published data. The findings of the review will be published in a peer-reviewed journal and presented at conferences.

For peer review only

## References

1. Welcome to CDC stacks | Worldwide prevalence of anaemia 1993-2005; WHO Global Database of anaemia - 5351 | Stephen B. Thacker CDC Library collection. <https://stacks.cdc.gov/view/cdc/5351>. Accessed 17 Apr 2019.
2. Mbanya D, Tayou Tagny C, Mboka C, Tetanye E. Clinical indices of severe anaemia requiring transfusion in young children aged 0 – 5 years: Guidelines for resource-limited settings. *Afr Sang*. 2008;2:1–4.
3. Scott SP, Chen-Edinboro LP, Caulfield LE, Murray-Kolb LE. The Impact of Anemia on Child Mortality: An Updated Review. *Nutrients*. 2014;6:5915–32.
4. Lozoff B, Beard J, Connor J, Felt B, Georgieff M, Schallert T. Long-Lasting Neural and Behavioral Effects of Iron Deficiency in Infancy. *Nutr Rev*. 2006;64 5 Pt 2:S34–91.
5. Santos JN, Rates SPM, Lemos SMA, Lamounier JA. Consequences of anemia on language development of children from a public day care center. *Rev Paul Pediatr*. 2009;27:67–73.
6. World Health Organization. Haemoglobin concentrations for the diagnosis of anaemia and assessment of severity. <https://apps.who.int/iris/handle/10665/85839>.
7. Kassebaum NJ, Jasrasaria R, Naghavi M, Wulf SK, Johns N, Lozano R, et al. A systematic analysis of global anemia burden from 1990 to 2010. *Blood*. 2014;123:615–24.
8. Prevalence of anemia among children (% of children under 5) | Data. <https://data.worldbank.org/indicator/SH.ANM.CHLD.ZS>. Accessed 5 Sep 2019.
9. Muoneke VU, ChidiIbekwe R. Prevalence and Aetiology of Severe Anaemia in Under-5 Children in Abakaliki South Eastern Nigeria. 2011.
10. Ewusie JE, Ahiadeke C, Beyene J, Hamid JS. Prevalence of anemia among under-5 children in the Ghanaian population: estimates from the Ghana demographic and health survey. *BMC Public Health*. 2014;14:626.
11. Brabin BJ, Premji Z, Verhoeff F. An Analysis of Anemia and Child Mortality. *J Nutr*. 2001;131:636S–648S.
12. Mbanya D, Tagny CT, Akamba A, Mekongo MO, Tetanye E. [Causes of anaemia in African children aged 5 to 10 years]. *Sante Montrouge Fr*. 2008;18:227–30.
13. WHO | Sustainable Development Goal 3: Health. WHO. <http://www.who.int/topics/sustainable-development-goals/targets/en/>. Accessed 3 May 2019.
14. Ouzzani M, Hammady H, Fedorowicz Z, Elmagarmid A. Rayyan—a web and mobile app for systematic reviews. *Syst Rev*. 2016;5:210.
15. Hoy D, Brooks P, Woolf A, Blyth F, March L, Bain C, et al. Assessing risk of bias in prevalence studies: modification of an existing tool and evidence of interrater agreement. *J Clin Epidemiol*. 2012;65:934–9.



- 1  
2  
3 16. Wells G, Shea B, O'Connell D, Peterson J, Losos M, Tugwell P. The Newcastle-Ottawa Scale  
4 (NOS) for assessing the quality of nonrandomised studies in meta-analyses. 2011.  
5 [http://www.ohri.ca/programs/clinical\\_epidemiology/oxford.asp](http://www.ohri.ca/programs/clinical_epidemiology/oxford.asp). Accessed 8 Sep 2019.  
6  
7  
8 17. McHugh ML. Interrater reliability: the kappa statistic. *Biochem Medica Biochem Medica*.  
9 2012;22:276–82.  
10  
11 18. Miller JJ. The Inverse of the Freeman – Tukey Double Arcsine Transformation. *Am Stat*.  
12 1978;32:138–138.  
13  
14 19. Cochran WG. The Combination of Estimates from Different Experiments. *Biometrics*.  
15 1954;10:101–29.  
16  
17 20. Egger M, Smith GD, Schneider M, Minder C. Bias in meta-analysis detected by a simple,  
18 graphical test. *BMJ*. 1997;315:629–34.  
19  
20 21. Liberati A, Altman DG, Tetzlaff J, Mulrow C, Gøtzsche PC, Ioannidis JPA, et al. The PRISMA  
21 Statement for Reporting Systematic Reviews and Meta-Analyses of Studies That Evaluate Health  
22 Care Interventions: Explanation and Elaboration. *PLOS Med*. 2009;6:e1000100.  
23  
24  
25  
26  
27

## 28 **List of tables**

29  
30 Table 1: Search Strategy for PubMed

31  
32 Supplementary Table 1: Risk of bias assessment checklist for prevalence studies (adapted from Hoy  
33 et al)  
34  
35

36 Supplementary Table 2: Newcastle - Ottawa quality assessment scale case-control studies  
37  
38

39  
40 Supplementary Table 3: Newcastle - Ottawa quality assessment scale case-control studies  
41  
42  
43  
44  
45  
46  
47  
48  
49  
50  
51  
52  
53  
54  
55  
56  
57  
58  
59  
60



Table 1: Search Strategy for PubMed

| SN | Search Items                                                                                                                                                                                                                                                                                                                                                                                                                                                                                                                                                                                                                                                                                                                                                                                                                                                                                                                                                                                                                                                                                                                                                                                                                                                                                                                                                                                                                                                                                                                                                                                                                                                                                                                                                                                                                                                                                                                                                                                                     | Hits |
|----|------------------------------------------------------------------------------------------------------------------------------------------------------------------------------------------------------------------------------------------------------------------------------------------------------------------------------------------------------------------------------------------------------------------------------------------------------------------------------------------------------------------------------------------------------------------------------------------------------------------------------------------------------------------------------------------------------------------------------------------------------------------------------------------------------------------------------------------------------------------------------------------------------------------------------------------------------------------------------------------------------------------------------------------------------------------------------------------------------------------------------------------------------------------------------------------------------------------------------------------------------------------------------------------------------------------------------------------------------------------------------------------------------------------------------------------------------------------------------------------------------------------------------------------------------------------------------------------------------------------------------------------------------------------------------------------------------------------------------------------------------------------------------------------------------------------------------------------------------------------------------------------------------------------------------------------------------------------------------------------------------------------|------|
| 1. | (((Africa* [tiab] OR Algeria [tiab] OR Angola [tiab] OR Benin [tiab] OR Botswana [tiab] OR "Burkina Faso" [tiab] OR Burundi [tiab] OR Cameroon [tiab] OR "Canary Islands" [tiab] OR "Cape Verde" [tiab] OR "Central African Republic" [tiab] OR Chad [tiab] OR Comoros [tiab] OR Congo [tiab] OR "Democratic Republic of Congo" [tiab] OR Djibouti [tiab] OR Egypt [tiab] OR "Equatorial Guinea" [tiab] OR Eritrea [tiab] OR Ethiopia [tiab] OR Gabon [tiab] OR Gambia [tiab] OR Ghana [tiab] OR Guinea [tiab] OR "Guinea Bissau" [tiab] OR "Ivory Coast" [tiab] OR "Cote d'Ivoire" [tiab] OR Jamahiriya [tiab] OR Kenya [tiab] OR Lesotho [tiab] OR Liberia [tiab] OR Libya [tiab] OR Madagascar [tiab] OR Malawi [tiab] OR Mali [tiab] OR Mauritania [tiab] OR Mauritius [tiab] OR Mayotte [tiab] OR Morocco [tiab] OR Mozambique [tiab] OR Namibia [tiab] OR Niger [tiab] OR Nigeria [tiab] OR Principe [tiab] OR Reunion [tiab] OR Rwanda [tiab] OR "Sao Tome" [tiab] OR Senegal [tiab] OR Seychelles [tiab] OR "Sierra Leone" [tiab] OR Somalia [tiab] OR "South Africa" [tiab] OR "South Sudan" [tiab] OR "St Helena" [tiab] OR Sudan [tiab] OR Swaziland [tiab] OR Tanzania [tiab] OR Togo [tiab] OR Tunisia [tiab] OR Uganda [tiab] OR "Western Sahara" [tiab] OR Zaire [tiab] OR Zambia [tiab] OR Zimbabwe [tiab] OR "Central Africa" [tiab] OR "Central African" [tiab] OR "West Africa" [tiab] OR "West African" [tiab] OR "Western Africa" [tiab] OR "Western African" [tiab] OR "East Africa" [tiab] OR "East African" [tiab] OR "Eastern Africa" [tiab] OR "Eastern African" [tiab] OR "North Africa" [tiab] OR "North African" [tiab] OR "Northern Africa" [tiab] OR "Northern African" [tiab] OR "South African" [tiab] OR "Southern Africa" [tiab] OR "Southern African" [tiab] OR "sub Saharan Africa" [tiab] OR "sub Saharan African" [tiab] OR "subSaharan Africa" [tiab] OR "subSaharan African" [tiab]) NOT ("guinea pig" [tiab] OR "guinea pigs" [tiab] OR "aspergillus niger [tiab]")))) |      |
| 2. | 'anemia' OR 'anaemia' OR 'anemias' OR 'anaemias' OR 'hemoglobin' OR 'haemoglobin'                                                                                                                                                                                                                                                                                                                                                                                                                                                                                                                                                                                                                                                                                                                                                                                                                                                                                                                                                                                                                                                                                                                                                                                                                                                                                                                                                                                                                                                                                                                                                                                                                                                                                                                                                                                                                                                                                                                                |      |
| 3. | #1 AND #2                                                                                                                                                                                                                                                                                                                                                                                                                                                                                                                                                                                                                                                                                                                                                                                                                                                                                                                                                                                                                                                                                                                                                                                                                                                                                                                                                                                                                                                                                                                                                                                                                                                                                                                                                                                                                                                                                                                                                                                                        |      |
| 4. | (("Child, Preschool"[Mesh]) AND "Infant"[Mesh])                                                                                                                                                                                                                                                                                                                                                                                                                                                                                                                                                                                                                                                                                                                                                                                                                                                                                                                                                                                                                                                                                                                                                                                                                                                                                                                                                                                                                                                                                                                                                                                                                                                                                                                                                                                                                                                                                                                                                                  |      |
| 5. | #3 AND #4                                                                                                                                                                                                                                                                                                                                                                                                                                                                                                                                                                                                                                                                                                                                                                                                                                                                                                                                                                                                                                                                                                                                                                                                                                                                                                                                                                                                                                                                                                                                                                                                                                                                                                                                                                                                                                                                                                                                                                                                        |      |
| 6. | Publication date limits: from database inception to 30 September 2019, with no language restrictions                                                                                                                                                                                                                                                                                                                                                                                                                                                                                                                                                                                                                                                                                                                                                                                                                                                                                                                                                                                                                                                                                                                                                                                                                                                                                                                                                                                                                                                                                                                                                                                                                                                                                                                                                                                                                                                                                                             |      |

## Supplementary Table 1: Risk of bias assessment checklist for prevalence studies (adapted from Hoy et al)

| Name of author(s):                                                                                                                                            |                                                                                                                                                                                                                                               |               |
|---------------------------------------------------------------------------------------------------------------------------------------------------------------|-----------------------------------------------------------------------------------------------------------------------------------------------------------------------------------------------------------------------------------------------|---------------|
| Year of publication:                                                                                                                                          |                                                                                                                                                                                                                                               |               |
| Study title:                                                                                                                                                  |                                                                                                                                                                                                                                               |               |
| Risk of bias items                                                                                                                                            | Risk of bias levels                                                                                                                                                                                                                           | Points scored |
| 1. Was the study's target population a close representation of the national population in relation to relevant variables, e.g. age, sex, occupation?          | <b>Yes (LOW RISK):</b> The study's target population was a close representation of the national population.                                                                                                                                   | 0             |
|                                                                                                                                                               | <b>No (HIGH RISK):</b> The study's target population was clearly NOT representative of the national population.                                                                                                                               | 1             |
| 2. Was the sampling frame a true or close representation of the target population?                                                                            | <b>Yes (LOW RISK):</b> The sampling frame was a true or close representation of the target population.                                                                                                                                        | 0             |
|                                                                                                                                                               | <b>No (HIGH RISK):</b> The sampling frame was NOT a true or close representation of the target population.                                                                                                                                    | 1             |
| 3. Was some form of random selection used to select the sample, OR, was a census undertaken?                                                                  | <b>Yes (LOW RISK):</b> A census was undertaken, OR, some form of random selection was used to select the sample (e.g. simple random sampling, stratified random sampling, cluster sampling, systematic sampling).                             | 0             |
|                                                                                                                                                               | <b>No (HIGH RISK):</b> A census was NOT undertaken, AND some form of random selection was NOT used to select the sample.                                                                                                                      | 1             |
| 4. Was the likelihood of non-response bias minimal?                                                                                                           | <b>Yes (LOW RISK):</b> The response rate for the study was $\geq 75\%$ , OR, an analysis was performed that showed no significant difference in relevant demographic characteristics between responders and non- responders                   | 0             |
|                                                                                                                                                               | <b>No (HIGH RISK):</b> The response rate was $<75\%$ , and if any analysis comparing responders and non-responders was done, it showed a significant difference in relevant demographic characteristics between responders and non-responders | 1             |
| 5. Were data collected directly from the subjects (as opposed to a proxy)?                                                                                    | <b>Yes (LOW RISK):</b> All data were collected directly from the subjects.                                                                                                                                                                    | 0             |
|                                                                                                                                                               | <b>No (HIGH RISK):</b> In some instances, data were collected from a proxy.                                                                                                                                                                   | 1             |
| 6. Was an acceptable case definition used in the study?                                                                                                       | <b>Yes (LOW RISK):</b> An acceptable case definition was used.                                                                                                                                                                                | 0             |
|                                                                                                                                                               | <b>No (HIGH RISK):</b> An acceptable case definition was NOT used                                                                                                                                                                             | 1             |
| 7. Was the study instrument that measured the parameter of interest (e.g. prevalence of low back pain) shown to have reliability and validity (if necessary)? | <b>Yes (LOW RISK):</b> The study instrument had been shown to have reliability and validity (if this was necessary), e.g. test-re- test, piloting, validation in a previous study, etc.                                                       | 0             |
|                                                                                                                                                               | <b>No (HIGH RISK):</b> The study instrument had NOT been shown to have reliability or validity (if this was necessary).                                                                                                                       | 1             |
| 8. Was the same mode of data collection used for all subjects?                                                                                                | <b>Yes (LOW RISK):</b> The same mode of data collection was used for all subjects.                                                                                                                                                            | 0             |
|                                                                                                                                                               | <b>No (HIGH RISK):</b> The same mode of data collection was NOT used for all subjects.                                                                                                                                                        | 1             |
| 9. Was the length of the shortest prevalence period for the parameter of interest appropriate?                                                                | <b>Yes (LOW RISK):</b> The length of the shortest prevalence period for the parameter of interest was appropriate.                                                                                                                            | 0             |
|                                                                                                                                                               | <b>No (HIGH RISK):</b> the length of the shortest prevalence period for the parameter of interest was NOT appropriate.                                                                                                                        | 1             |
| 10. Were the numerator(s) and denominator(s) for the parameter of interest appropriate                                                                        | <b>Yes (LOW RISK):</b> The paper presented appropriate numerator(s) AND denominator(s) for the parameter of interest (e.g. the prevalence of low back pain).                                                                                  | 0             |
|                                                                                                                                                               | <b>No (HIGH RISK):</b> The paper did present numerator(s) AND denominator(s) for the parameter of interest but one or more of these were inappropriate.                                                                                       | 1             |
| <b>Summary on the overall risk of study bias</b>                                                                                                              | <b>LOW RISK</b>                                                                                                                                                                                                                               | 0-4           |
|                                                                                                                                                               | <b>MODERATE RISK</b>                                                                                                                                                                                                                          | 5-7           |
|                                                                                                                                                               | <b>HIGH RISK</b>                                                                                                                                                                                                                              | 8-10          |

**Supplementary Table 2. NEWCASTLE - OTTAWA QUALITY ASSESSMENT SCALE  
CASE CONTROL STUDIES**

Note: A study can be awarded a maximum of one star for each numbered item within the Selection and Exposure categories. A maximum of two stars can be given for Comparability.

| No                   | Criterion                                                                  | Decision rule                                                                                                                                                                                               | Score (* = 1, No* = 0) |
|----------------------|----------------------------------------------------------------------------|-------------------------------------------------------------------------------------------------------------------------------------------------------------------------------------------------------------|------------------------|
| <b>Selection</b>     |                                                                            |                                                                                                                                                                                                             |                        |
| 1.                   | Is the case definition adequate?                                           | a) yes, with independent validation *<br>b) yes, eg record linkage or based on self reports<br>c) no description                                                                                            |                        |
| 2.                   | Representativeness of the cases                                            | a) consecutive or obviously representative series of cases *<br>b) potential for selection biases or not stated                                                                                             |                        |
| 3.                   | Selection of Controls                                                      | a) community controls *<br>b) hospital controls<br>c) no description                                                                                                                                        |                        |
| 4.                   | Definition of Controls                                                     | a) no history of disease (endpoint) *<br>b) no description of source                                                                                                                                        |                        |
| <b>Comparability</b> |                                                                            |                                                                                                                                                                                                             |                        |
| 1.                   | Comparability of cases and controls on the basis of the design or analysis | a) study controls for age *<br>b) study controls for gender *                                                                                                                                               |                        |
| <b>Exposure</b>      |                                                                            |                                                                                                                                                                                                             |                        |
| 1.                   | Ascertainment of exposure                                                  | a) secure record *<br>b) structured interview where blind to case/control status *<br>c) interview not blinded to case/control status<br>d) written self report or medical record only<br>e) no description |                        |
| 2.                   | Same method of ascertainment for cases and controls                        | a) Yes *<br>b) No                                                                                                                                                                                           |                        |
| 3.                   | Non-Response rate                                                          | a) same rate for both groups *<br>b) non respondents described<br>c) rate different and no designation                                                                                                      |                        |
| Score                |                                                                            |                                                                                                                                                                                                             |                        |

### Supplementary Table 3. NEWCASTLE - OTTAWA QUALITY ASSESSMENT SCALE COHORT STUDIES

**Note:** A study can be awarded a maximum of one star for each numbered item within the Selection and Outcome categories. A maximum of two stars can be given for Comparability

| No                   | Criterion                                                                | Decision rule                                                                                                                                                                                                                                                                  | Score (* = 1, No* = 0) |
|----------------------|--------------------------------------------------------------------------|--------------------------------------------------------------------------------------------------------------------------------------------------------------------------------------------------------------------------------------------------------------------------------|------------------------|
| <b>Selection</b>     |                                                                          |                                                                                                                                                                                                                                                                                |                        |
| 1.                   | Representativeness of the exposed cohort                                 | a) Consecutive eligible participants were selected, participants were randomly selected, or all participants were invited to participate from the source population*<br>b) Not satisfying requirements in part (a), or not stated.                                             |                        |
| 2.                   | Selection of the non-exposed cohort                                      | a) Selected from the same source population*<br>b) Selected from a different source population<br>c) No description                                                                                                                                                            |                        |
| 3.                   | Ascertainment of exposure                                                | a) secure record (eg surgical records) *<br>b) structured interview *<br>c) written self report<br>d) no description                                                                                                                                                           |                        |
| 4.                   | Demonstration that outcome of interest was not present at start of study | a) Yes *<br>b) No                                                                                                                                                                                                                                                              |                        |
| <b>Comparability</b> |                                                                          |                                                                                                                                                                                                                                                                                |                        |
| 1.                   | Comparability of cohorts on the basis of the design or analysis          | a) study controls for age*<br>b) study controls for gender *                                                                                                                                                                                                                   |                        |
| <b>Outcome</b>       |                                                                          |                                                                                                                                                                                                                                                                                |                        |
| 1.                   | Assessment of outcome                                                    | a) independent blind assessment *<br>b) record linkage *<br>c) self report<br>d) no description                                                                                                                                                                                |                        |
| 2.                   | Was follow-up long enough for outcomes to occur                          | a) Yes *<br>b) No                                                                                                                                                                                                                                                              |                        |
| 3.                   | Adequacy of follow up of cohorts                                         | a) complete follow up - all subjects accounted for *<br>b) subjects lost to follow up unlikely to introduce bias - small number lost (< 15% follow up, or description provided of those lost) *<br>c) follow up rate < 85% and no description of those lost<br>d) no statement |                        |
| Score                |                                                                          |                                                                                                                                                                                                                                                                                |                        |

**PRISMA-P (Preferred Reporting Items for Systematic review and Meta-Analysis Protocols) 2015 checklist: recommended items to address in a systematic review protocol**

| Section and topic                 | Item No | Checklist item                                                                                                                                                                                                                | Page #     |
|-----------------------------------|---------|-------------------------------------------------------------------------------------------------------------------------------------------------------------------------------------------------------------------------------|------------|
| <b>ADMINISTRATIVE INFORMATION</b> |         |                                                                                                                                                                                                                               |            |
| Title:                            |         |                                                                                                                                                                                                                               |            |
| Identification                    | 1a      | Identify the report as a protocol of a systematic review                                                                                                                                                                      | 1          |
| Update                            | 1b      | If the protocol is for an update of a previous systematic review, identify as such                                                                                                                                            | NA         |
| Registration                      | 2       | If registered, provide the name of the registry (such as PROSPERO) and registration number                                                                                                                                    | 3          |
| Authors:                          |         |                                                                                                                                                                                                                               |            |
| Contact                           | 3a      | Provide name, institutional affiliation, e-mail address of all protocol authors; provide physical mailing address of corresponding author                                                                                     | 1          |
| Contributions                     | 3b      | Describe contributions of protocol authors and identify the guarantor of the review                                                                                                                                           | 13         |
| Amendments                        | 4       | If the protocol represents an amendment of a previously completed or published protocol, identify as such and list changes; otherwise, state plan for documenting important protocol amendments                               | 11         |
| Support:                          |         |                                                                                                                                                                                                                               |            |
| Sources                           | 5a      | Indicate sources of financial or other support for the review                                                                                                                                                                 | 13         |
| Sponsor                           | 5b      | Provide name for the review funder and/or sponsor                                                                                                                                                                             | NA         |
| Role of sponsor or funder         | 5c      | Describe roles of funder(s), sponsor(s), and/or institution(s), if any, in developing the protocol                                                                                                                            | NA         |
| <b>INTRODUCTION</b>               |         |                                                                                                                                                                                                                               |            |
| Rationale                         | 6       | Describe the rationale for the review in the context of what is already known                                                                                                                                                 | 4          |
| Objectives                        | 7       | Provide an explicit statement of the question(s) the review will address with reference to participants, interventions, comparators, and outcomes (PICO)                                                                      | 5          |
| <b>METHODS</b>                    |         |                                                                                                                                                                                                                               |            |
| Eligibility criteria              | 8       | Specify the study characteristics (such as PICO, study design, setting, time frame) and report characteristics (such as years considered, language, publication status) to be used as criteria for eligibility for the review | 5-6        |
| Information sources               | 9       | Describe all intended information sources (such as electronic databases, contact with study authors, trial registers or other grey literature sources) with planned dates of coverage                                         | 6-7        |
| Search strategy                   | 10      | Present draft of search strategy to be used for at least one electronic database, including planned limits, such that it could be repeated                                                                                    | 6, Table 1 |
| Study records:                    |         |                                                                                                                                                                                                                               |            |
| Data                              | 11a     | Describe the mechanism(s) that will be used to manage records and data throughout the review                                                                                                                                  | 7          |

|                                    |     |                                                                                                                                                                                                                                                  |      |
|------------------------------------|-----|--------------------------------------------------------------------------------------------------------------------------------------------------------------------------------------------------------------------------------------------------|------|
| management                         |     |                                                                                                                                                                                                                                                  |      |
| Selection process                  | 11b | State the process that will be used for selecting studies (such as two independent reviewers) through each phase of the review (that is, screening, eligibility and inclusion in meta-analysis)                                                  | 7    |
| Data collection process            | 11c | Describe planned method of extracting data from reports (such as piloting forms, done independently, in duplicate), any processes for obtaining and confirming data from investigators                                                           | 8    |
| Data items                         | 12  | List and define all variables for which data will be sought (such as PICO items, funding sources), any pre-planned data assumptions and simplifications                                                                                          | 8    |
| Outcomes and prioritization        | 13  | List and define all outcomes for which data will be sought, including prioritization of main and additional outcomes, with rationale                                                                                                             | 8    |
| Risk of bias in individual studies | 14  | Describe anticipated methods for assessing risk of bias of individual studies, including whether this will be done at the outcome or study level, or both; state how this information will be used in data synthesis                             | 9    |
| Data synthesis                     | 15a | Describe criteria under which study data will be quantitatively synthesised                                                                                                                                                                      | 9-10 |
|                                    | 15b | If data are appropriate for quantitative synthesis, describe planned summary measures, methods of handling data and methods of combining data from studies, including any planned exploration of consistency (such as $I^2$ , Kendall's $\tau$ ) | 9-10 |
|                                    | 15c | Describe any proposed additional analyses (such as sensitivity or subgroup analyses, meta-regression)                                                                                                                                            | 10   |
|                                    | 15d | If quantitative synthesis is not appropriate, describe the type of summary planned                                                                                                                                                               | 10   |
| Meta-bias(es)                      | 16  | Specify any planned assessment of meta-bias(es) (such as publication bias across studies, selective reporting within studies)                                                                                                                    | 9    |
| Confidence in cumulative evidence  | 17  | Describe how the strength of the body of evidence will be assessed (such as GRADE)                                                                                                                                                               | NA   |
