# Supplementary material for: Prevalence and determinants of anaemia in children aged 6–59 months in Africa: a protocol for systematic review and meta-analysis
Source: PubMed Central journal article supplement — BMJ Open. 2020 Apr 16;10(4):e032042. doi: 10.1136/bmjopen-2019-032042 (PMC7199940; doi:10.1136/bmjopen-2019-032042), 2020-04-16
Supplement: bmjopen-2019-032042supp001.pdf [file bmjopen-2019-032042supp001.pdf]

**Supplementary Table 1: Risk of bias assessment checklist for prevalence studies (adapted from Hoy et al)**

| Name of author(s):                                                                                                                                            |                                                                                                                                                                                                                                                |               |
|---------------------------------------------------------------------------------------------------------------------------------------------------------------|------------------------------------------------------------------------------------------------------------------------------------------------------------------------------------------------------------------------------------------------|---------------|
| Year of publication:                                                                                                                                          |                                                                                                                                                                                                                                                |               |
| Study title:                                                                                                                                                  |                                                                                                                                                                                                                                                |               |
| Risk of bias items                                                                                                                                            | Risk of bias levels                                                                                                                                                                                                                            | Points scored |
| 1. Was the study's target population a close representation of the national population in relation to relevant variables, e.g. age, sex, occupation?          | <b>Yes (LOW RISK):</b> The study's target population was a close representation of the national population.                                                                                                                                    | 0             |
|                                                                                                                                                               | <b>No (HIGH RISK):</b> The study's target population was clearly NOT representative of the national population.                                                                                                                                | 1             |
| 2. Was the sampling frame a true or close representation of the target population?                                                                            | <b>Yes (LOW RISK):</b> The sampling frame was a true or close representation of the target population.                                                                                                                                         | 0             |
|                                                                                                                                                               | <b>No (HIGH RISK):</b> The sampling frame was NOT a true or close representation of the target population.                                                                                                                                     | 1             |
| 3. Was some form of random selection used to select the sample, OR, was a census undertaken?                                                                  | <b>Yes (LOW RISK):</b> A census was undertaken, OR, some form of random selection was used to select the sample (e.g. simple random sampling, stratified random sampling, cluster sampling, systematic sampling).                              | 0             |
|                                                                                                                                                               | <b>No (HIGH RISK):</b> A census was NOT undertaken, AND some form of random selection was NOT used to select the sample.                                                                                                                       | 1             |
| 4. Was the likelihood of non-response bias minimal?                                                                                                           | <b>Yes (LOW RISK):</b> The response rate for the study was $\geq 75\%$ , OR, an analysis was performed that showed no significant difference in relevant demographic characteristics between responders and non-responders                     | 0             |
|                                                                                                                                                               | <b>No (HIGH RISK):</b> The response rate was $< 75\%$ , and if any analysis comparing responders and non-responders was done, it showed a significant difference in relevant demographic characteristics between responders and non-responders | 1             |
| 5. Were data collected directly from the subjects (as opposed to a proxy)?                                                                                    | <b>Yes (LOW RISK):</b> All data were collected directly from the subjects.                                                                                                                                                                     | 0             |
|                                                                                                                                                               | <b>No (HIGH RISK):</b> In some instances, data were collected from a proxy.                                                                                                                                                                    | 1             |
| 6. Was an acceptable case definition used in the study?                                                                                                       | <b>Yes (LOW RISK):</b> An acceptable case definition was used.                                                                                                                                                                                 | 0             |
|                                                                                                                                                               | <b>No (HIGH RISK):</b> An acceptable case definition was NOT used                                                                                                                                                                              | 1             |
| 7. Was the study instrument that measured the parameter of interest (e.g. prevalence of low back pain) shown to have reliability and validity (if necessary)? | <b>Yes (LOW RISK):</b> The study instrument had been shown to have reliability and validity (if this was necessary), e.g. test-re-test, piloting, validation in a previous study, etc.                                                         | 0             |
|                                                                                                                                                               | <b>No (HIGH RISK):</b> The study instrument had NOT been shown to have reliability or validity (if this was necessary).                                                                                                                        | 1             |
| 8. Was the same mode of data collection used for all subjects?                                                                                                | <b>Yes (LOW RISK):</b> The same mode of data collection was used for all subjects.                                                                                                                                                             | 0             |
|                                                                                                                                                               | <b>No (HIGH RISK):</b> The same mode of data collection was NOT used for all subjects.                                                                                                                                                         | 1             |
| 9. Was the length of the shortest prevalence period for the parameter of interest appropriate?                                                                | <b>Yes (LOW RISK):</b> The length of the shortest prevalence period for the parameter of interest was appropriate.                                                                                                                             | 0             |
|                                                                                                                                                               | <b>No (HIGH RISK):</b> the length of the shortest prevalence period for the parameter of interest was NOT appropriate.                                                                                                                         | 1             |
| 10. Were the numerator(s) and denominator(s) for the parameter of interest appropriate                                                                        | <b>Yes (LOW RISK):</b> The paper presented appropriate numerator(s) AND denominator(s) for the parameter of interest (e.g. the prevalence of low back pain).                                                                                   | 0             |
|                                                                                                                                                               | <b>No (HIGH RISK):</b> The paper did present numerator(s) AND denominator(s) for the parameter of interest but one or more of these were inappropriate.                                                                                        | 1             |
| <b>Summary on the overall risk of study bias</b>                                                                                                              | <b>LOW RISK</b>                                                                                                                                                                                                                                | 0-4           |
|                                                                                                                                                               | <b>MODERATE RISK</b>                                                                                                                                                                                                                           | 5-7           |
|                                                                                                                                                               | <b>HIGH RISK</b>                                                                                                                                                                                                                               | 8-10          |

**Supplementary Table 2. NEWCASTLE - OTTAWA QUALITY ASSESSMENT SCALE  
CASE CONTROL STUDIES**

Note: A study can be awarded a maximum of one star for each numbered item within the Selection and Exposure categories. A maximum of two stars can be given for Comparability.

| No                   | Criterion                                                                  | Decision rule                                                                                                                                                                                               | Score (* = 1, No* = 0) |
|----------------------|----------------------------------------------------------------------------|-------------------------------------------------------------------------------------------------------------------------------------------------------------------------------------------------------------|------------------------|
| <b>Selection</b>     |                                                                            |                                                                                                                                                                                                             |                        |
| 1.                   | Is the case definition adequate?                                           | a) yes, with independent validation *<br>b) yes, eg record linkage or based on self reports<br>c) no description                                                                                            |                        |
| 2.                   | Representativeness of the cases                                            | a) consecutive or obviously representative series of cases *<br>b) potential for selection biases or not stated                                                                                             |                        |
| 3.                   | Selection of Controls                                                      | a) community controls *<br>b) hospital controls<br>c) no description                                                                                                                                        |                        |
| 4.                   | Definition of Controls                                                     | a) no history of disease (endpoint) *<br>b) no description of source                                                                                                                                        |                        |
| <b>Comparability</b> |                                                                            |                                                                                                                                                                                                             |                        |
| 1.                   | Comparability of cases and controls on the basis of the design or analysis | a) study controls for age*<br>b) study controls for gender *                                                                                                                                                |                        |
| <b>Exposure</b>      |                                                                            |                                                                                                                                                                                                             |                        |
| 1.                   | Ascertainment of exposure                                                  | a) secure record *<br>b) structured interview where blind to case/control status *<br>c) interview not blinded to case/control status<br>d) written self report or medical record only<br>e) no description |                        |
| 2.                   | Same method of ascertainment for cases and controls                        | a) Yes *<br>b) No                                                                                                                                                                                           |                        |
| 3.                   | Non-Response rate                                                          | a) same rate for both groups *<br>b) non respondents described<br>c) rate different and no designation                                                                                                      |                        |
| Score                |                                                                            |                                                                                                                                                                                                             |                        |

### Supplementary Table 3. NEWCASTLE - OTTAWA QUALITY ASSESSMENT SCALE COHORT STUDIES

Note: A study can be awarded a maximum of one star for each numbered item within the Selection and Outcome categories. A maximum of two stars can be given for Comparability

| No                   | Criterion                                                                | Decision rule                                                                                                                                                                                                                                                                  | Score (* = 1, No* = 0) |
|----------------------|--------------------------------------------------------------------------|--------------------------------------------------------------------------------------------------------------------------------------------------------------------------------------------------------------------------------------------------------------------------------|------------------------|
| <b>Selection</b>     |                                                                          |                                                                                                                                                                                                                                                                                |                        |
| 1.                   | Representativeness of the exposed cohort                                 | a) Consecutive eligible participants were selected, participants were randomly selected, or all participants were invited to participate from the source population*<br>b) Not satisfying requirements in part (a), or not stated.                                             |                        |
| 2.                   | Selection of the non-exposed cohort                                      | a) Selected from the same source population*<br>b) Selected from a different source population<br>c) No description                                                                                                                                                            |                        |
| 3.                   | Ascertainment of exposure                                                | a) secure record (eg surgical records) *<br>b) structured interview *<br>c) written self report<br>d) no description                                                                                                                                                           |                        |
| 4.                   | Demonstration that outcome of interest was not present at start of study | a) Yes *<br>b) No                                                                                                                                                                                                                                                              |                        |
| <b>Comparability</b> |                                                                          |                                                                                                                                                                                                                                                                                |                        |
| 1.                   | Comparability of cohorts on the basis of the design or analysis          | a) study controls for age*<br>b) study controls for gender *                                                                                                                                                                                                                   |                        |
| <b>Outcome</b>       |                                                                          |                                                                                                                                                                                                                                                                                |                        |
| 1.                   | Assessment of outcome                                                    | a) independent blind assessment *<br>b) record linkage *<br>c) self report<br>d) no description                                                                                                                                                                                |                        |
| 2.                   | Was follow-up long enough for outcomes to occur                          | a) Yes *<br>b) No                                                                                                                                                                                                                                                              |                        |
| 3.                   | Adequacy of follow up of cohorts                                         | a) complete follow up - all subjects accounted for *<br>b) subjects lost to follow up unlikely to introduce bias - small number lost (< 15% follow up, or description provided of those lost) *<br>c) follow up rate < 85% and no description of those lost<br>d) no statement |                        |
| Score                |                                                                          |                                                                                                                                                                                                                                                                                |                        |
